# 1 **Costs and cost-effectiveness of influenza illness and vaccination in low- and** 2 **middle-income countries: A systematic review from 2012 to 2021**

3 Radhika Gharpure<sup>1</sup>, Anna N. Chard<sup>1</sup>, Maria Cabrera Escobar<sup>2</sup>, Weigong Zhou<sup>1</sup>, Joseph S. Bresee<sup>2</sup>, Eduardo  
4 Azziz-Baumgartner<sup>1</sup>, Sarah W. Pallas<sup>1</sup>, Kathryn E. Lafond<sup>1</sup>

5 <sup>1</sup>U.S. Centers for Disease Control and Prevention, Atlanta, GA

6 <sup>2</sup>Task Force for Global Health, Atlanta, GA

7

## 8 **Abstract** (300/300 words)

9 Introduction: Historically, lack of data on cost-effectiveness of influenza vaccination has been identified  
10 as a barrier to vaccine use in low- and middle-income countries. We conducted a systematic review of  
11 economic evaluations describing (1) costs of influenza illness, (2) costs of influenza vaccination  
12 programs, and (3) vaccination cost-effectiveness from low- and middle-income countries to assess if  
13 gaps persist.

14 Methods: We performed a systematic search in Medline, Embase, Cochrane Library, CINAHL, and Scopus  
15 using a combination of the following key words: “influenza” AND “cost” OR “economic.” The search  
16 included studies with publication years 2012 through 2021. We abstracted general study characteristics  
17 and data specific to each of the three areas of review.

18 Results: Of 50 included studies, 24 presented data on cost-effectiveness, 23 on cost-of-illness, and four  
19 on program costs. Represented countries were classified as upper-middle income (UMIC; n=11), lower-  
20 middle income (LMIC; n=7), and low-income (LIC; n=3). The most evaluated target groups were children  
21 (n=26 studies), older adults (n=16), and persons with chronic medical conditions (n=12); fewer studies  
22 evaluated pregnant persons (n=8), healthcare workers (n=4), and persons in congregate living settings  
23 (n=1). Costs-of-illness were generally higher in UMICs than in LMICs/LICs; however, the highest total  
24 costs, as a percent of gross domestic product and national health expenditure, were reported from an  
25 LIC. Among studies that evaluated the cost-effectiveness of influenza vaccine introduction, most (83%)  
26 interpreted at least one scenario per target group as either cost-effective or cost-saving, based on  
27 thresholds designated in the study.

28 Conclusions: Continued evaluation of the economic burden of influenza illness and costs and cost-  
29 effectiveness of influenza vaccination, particularly in low-income countries and among  
30 underrepresented target groups (e.g., healthcare workers and pregnant persons), is needed; use of  
31 standardized methodology could facilitate pooling across settings. Robust, global economic data are  
32 critical to design and maintain sustainable influenza vaccination programs.

33

#### 34 **Summary box**

35 What is already known on this topic: Prior systematic reviews and surveys have demonstrated a need for  
36 economic data on influenza vaccination from low- and middle-income countries to inform program  
37 implementation and expansion. Standardized tools and guidance have become available in recent years  
38 to guide economic evaluations for influenza illness and vaccination in low-and middle-income countries.

39 What this study adds: This article summarizes the literature on costs of influenza illness, costs of  
40 influenza vaccination programs, and vaccination cost-effectiveness from low- and middle-income  
41 country settings during 2012–2021.

42 How this study might affect research, practice, or policy: The findings suggest value-for-money for  
43 influenza vaccination and increased interest in economic evaluations in recent years, but continued,  
44 standardized evaluation of costs and cost-effectiveness is needed, particularly from low-income  
45 countries and for underrepresented target groups.

46

47 **Article main text** (4695/5000 words)

#### 48 **Introduction**

49 Seasonal influenza vaccination is a key intervention to prevent morbidity and mortality from influenza  
50 virus infections [1]. The World Health Organization (WHO) Strategic Advisory Group of Experts on  
51 Immunization (SAGE) recommends that countries starting or expanding influenza vaccination programs  
52 prioritize specific target groups at high risk for transmission or severe disease, including healthcare  
53 workers, individuals with chronic medical conditions, older adults, and pregnant persons. Additionally,  
54 depending on priorities, available resources, and feasibility, countries might consider additional target

55 groups for vaccination, including young children, persons in congregate living settings, disadvantaged  
56 populations, and indigenous populations [1]. As of 2018, 118 of 194 (61%) WHO member states had an  
57 influenza vaccination policy [2]; nevertheless, while low- and middle-income countries represent 40% of  
58 the world's population and have a high burden of influenza illness [3-5], they constituted 85% of  
59 countries without a policy [2].

60 A 2019 survey indicated that lack of data on cost-effectiveness of influenza vaccination programs was a  
61 key barrier to initiating and expanding influenza vaccination programs in low- and middle-income  
62 countries [6]. Cost-effectiveness analyses and other economic evaluations can provide important  
63 information to guide evidence-based decision making, resource allocation, and long-term investment in  
64 vaccination by demonstrating value-for-money; however, these evaluations require accurate input data,  
65 including the costs of influenza illness, costs of vaccination, and impact of the vaccination program, in  
66 order to yield relevant and reliable results [7].

67 To help countries better assess the value of influenza vaccination, WHO and partners have developed  
68 standardized tools and updated guidance in recent years for economic evaluations regarding influenza  
69 illness and vaccination. These include 2016 guidance on estimating influenza economic burden [8, 9],  
70 2016 guidance on economic evaluations for influenza vaccination, including cost-effectiveness analyses  
71 [10, 11], and a 2020 update to the Seasonal Influenza Immunization Costing Tool (SICT) [12]. While  
72 previous systematic reviews have described economic data for influenza from low- and middle-income  
73 countries [13-17], these were generally conducted prior to the availability of these tools; more recent  
74 reviews have described data from high-income settings [16, 18, 19], focused on specific target groups  
75 [20-22], or addressed questions such as the comparative cost-effectiveness of quadrivalent and trivalent  
76 vaccines [23]. To summarize recent data and assess remaining gaps, we conducted an updated  
77 systematic review of studies describing the costs of influenza illness, costs of influenza vaccination  
78 programs, and influenza vaccination cost-effectiveness from low- and middle-income country settings  
79 within the last 10 years (2012–2021).

## 80 **Methods**

81 This review followed the Preferred Reporting Items for Systematic Review and Meta-analysis (PRISMA)  
82 guidelines for systematic reviews and was registered at PROSPERO (international prospective register of  
83 systematic reviews) under protocol number CRD42022304803.

84 *Search strategy and study selection*

85 We performed a systematic search using Medline, Embase, Cochrane Library, CINAHL, and Scopus in  
86 January 2022. The search included studies with a publication year of 2012 through 2021. Search terms  
87 were a combination of the following key words: “influenza” AND “cost” OR “economic;” specific search  
88 syntax for each database is provided in **Supplemental Table S1**.

89 Studies were eligible if they met the following inclusion criteria: (1) presented original, peer-reviewed  
90 findings on at least one of the following: (a) cost of illness, (b) cost of vaccination program, or (c) cost-  
91 effectiveness, cost-utility, or cost-benefit of vaccination (hereafter referred to as “cost-effectiveness  
92 studies”) for seasonal influenza; and (2) included data for at least one low- or middle-income country  
93 based on World Bank income group classification during the study period [24]. We excluded studies  
94 that: (1) did not present original or peer-reviewed findings (e.g., literature reviews, conference  
95 abstracts, and editorials); (2) only presented data about infection with or vaccination for pandemic or  
96 novel influenza viruses (e.g., influenza A(H1N1)2009 pandemic strain); or (3) included data from mid-  
97 2009 through mid-2010 that could not be disaggregated from other results, as these months were  
98 considered to represent the global influenza A(H1N1)2009 pandemic period [25].

99 Specifically, cost-of-illness studies were required to use a case definition of laboratory-confirmed  
100 influenza (LCI) or syndromic definitions of influenza-like-illness (ILI) and/or severe acute respiratory  
101 infection (SARI), though estimates could then be extrapolated to include other disease presentations  
102 (e.g., non-medically attended illnesses). Program cost studies were required to present population-level  
103 estimates of vaccination program costs, i.e., studies that described only cost of vaccination to the  
104 individual were excluded. Cost-effectiveness studies were required to include a comparison of influenza  
105 vaccination versus no vaccination or modifications to current vaccination program (e.g., increase in  
106 vaccination coverage); studies that only compared the cost-effectiveness of different influenza vaccine  
107 products (e.g., quadrivalent versus trivalent, adjuvanted versus non-adjuvanted, or live attenuated  
108 versus inactivated) were not included.

109 Titles and abstracts were independently screened by 2 reviewers (RG, AC, MC, or WZ) for eligibility, with  
110 a third reviewer resolving any conflicting decisions. English-language full texts were again reviewed by 2  
111 reviewers (RG, AC, MC, or WZ) for eligibility, with a third reviewer resolving any conflicting decisions.  
112 Publications in other languages (Mandarin Chinese, Russian, Spanish, and Bulgarian) were reviewed by a  
113 single native-language speaker. All screening procedures were performed using Covidence, a web-based

114 collaboration software platform for systematic reviews [26]. We also reviewed references from included  
115 studies to identify additional relevant literature for inclusion.

#### 116 *Data extraction and quality assessment*

117 Data from English-language publications were independently extracted by two reviewers (RG, AC, MC,  
118 or WZ), and disagreement was resolved by a discussion between the reviewers and consultation with a  
119 third reviewer if necessary. Data from publications in Mandarin Chinese were abstracted by a single  
120 native-language speaker (WZ); no other non-English publications met inclusion criteria.

121 A standardized Microsoft Excel-based data extraction form was developed to include the following  
122 information for all studies: country, study period, study methods, SAGE target group(s) represented,  
123 economic evaluation perspective, and funding source. Additionally, for cost-of-illness studies, we  
124 abstracted direct and indirect costs of all illnesses, outpatient visits, and hospitalizations. For program  
125 cost studies, we abstracted financial and economic costs both including and excluding vaccine  
126 procurement. Financial costs were incremental monetary expenditures made for the influenza  
127 vaccination program; economic costs included all financial costs as well as the value of existing  
128 resources and donations (as categorized by study authors). For cost-effectiveness studies, we abstracted  
129 the study intervention(s), comparator(s), incremental cost-effectiveness ratio (ICER), ICER  
130 interpretation, and cost-effectiveness threshold. If reported, we preferentially abstracted median values  
131 for economic variables; if medians were not reported, we abstracted mean values or ranges. We did not  
132 contact study authors to request additional unpublished data.

133 We used World Bank data to classify the income group of countries during the study period [24]; if  
134 countries changed income group classification during the study period, the higher classification was  
135 used. Additionally, we used World Bank data to obtain the gross domestic product (GDP) of countries  
136 during the study period [24]; for multi-year studies, the final year of the study period was used. For cost-  
137 of-illness and program cost studies, we also used World Health Organization data to obtain the Current  
138 Health Expenditure (CHE) and Domestic General Government Health Expenditure, respectively, of  
139 countries during the study period [27]. If no study period was specified, we used 3 years prior to the  
140 publication year for all relevant inputs as in prior systematic reviews [23].

141 For each English-language publication, two reviewers (RG, AC, MC, or WZ) assessed study quality and  
142 risk of bias using the Consolidated Health Economic Evaluation Reporting Standard (CHEERS) checklist

143 [28]; for non-English publications, one native speaker (WZ) completed the CHEERS checklist. The  
144 checklist includes 24 criteria developed to ensure standardized reporting across economic studies; all 24  
145 were assessed for cost-effectiveness studies, and modified sets of 13 and 15 criteria were used for cost-  
146 of-illness and program cost studies, respectively (**Supplemental Table S2**).

#### 147 *Data conversion and analysis*

148 We converted all currencies to US dollars (US\$) using the International Monetary Fund official exchange  
149 rate for the nominal year [24] and then inflated all results to 2022 US\$ using the U.S. Bureau of  
150 Economic Analysis GDP implicit price deflator [29, 30]. If a nominal currency year was not presented in  
151 the study, we used the final year of the study period or, if the study period was not stated, 3 years prior  
152 to the publication year. We calculated the gross national cost-of-illness and program cost, when  
153 reported, as a proportion of the national GDP and the national health expenditure. Additionally, we  
154 collated direct and indirect costs by SAGE target group and income group and reported ranges across  
155 strata. Similarly, we also collated ICER results by SAGE target group and income group and calculated the  
156 proportion of studies that interpreted findings as “cost-saving” (ICER<0), “cost-effective” (dependent on  
157 cost-effectiveness threshold specified in the study), or “not cost-effective.” All analyses were performed  
158 using SAS (version 9.4) and Microsoft Excel.

## 159 **Results**

### 160 *Study characteristics and quality assessment*

161 Of 6,614 total studies identified, 50 met eligibility criteria and were included in this review, including 43  
162 English-language and 7 Chinese-language studies (**Figure 1, Supplemental Table S3**). Study  
163 characteristics are presented in **Table 1**; a total of 24 studies presented cost-effectiveness findings, 23  
164 presented cost-of-illness, and four presented program costs. Studies included data from 20 country  
165 settings, which were classified as upper-middle income countries (UMICs; n=11), lower-middle income  
166 countries (LMICs; n=7), and low-income countries (LICs; n=3); one country, China, was classified as both  
167 UMIC and LMIC corresponding to multiple studies before and after an upward change in World Bank  
168 classification in 2010. These 20 countries represented 13% of 157 countries/territories classified as low-  
169 or middle-income countries in any year during 2005 (earliest year of data presented in included studies)  
170 through 2021. The most frequently evaluated SAGE target groups were children (n=26 studies, inclusive  
171 of children <18 years), older adults (n=16, inclusive of adults ≥60 years), and persons with chronic

172 medical conditions (n=12); fewer studies evaluated pregnant persons (n=8), healthcare workers (n=4),  
173 and persons in congregate living settings (n=1).

174 Quality assessment scores indicated that the quality of included studies was acceptable; median scores  
175 by study type were 12 out of 13 (92%; interquartile range [IQR] 87–100%) for cost-of-illness, 14 out of 15  
176 (93%; IQR 93–95%) for program costs, and 23 out of 24 (96%; IQR 86–100%) for cost-effectiveness  
177 studies (**Supplemental Figure S1**); only two of 50 studies (4%) scored <75%. Of 44 studies that reported  
178 a funding source, seven (16%) were supported by pharmaceutical industry and 20 (45%) by WHO or the  
179 US Centers for Disease Control and Prevention (CDC).

#### 180 *Cost-of-illness studies*

181 The cost-per-episode of influenza illness ranged widely across studies (**Figure 2**). Twenty-three studies  
182 presented data about cost-per-episode, representing six UMICs (China [31-40], Colombia [41],  
183 Kazakhstan [42], Panama [43], Romania [42], South Africa [44, 45], and Thailand [46]), five LMICs (China  
184 [based on classification during study period] [47], El Salvador [43], India [48], Kenya [49], Ukraine [42],  
185 and Vietnam [50, 51]), and two LICs (Bangladesh [52] and Mali [53]). (**Supplemental Table S4**). Among  
186 the general population, the total cost-per-episode for outpatient visits, inclusive of direct and indirect  
187 costs, ranged from \$6.24–155.92 (2022 US\$); the total cost-per-episode for hospitalizations ranged from  
188 \$106.85–1617.14. Among SAGE target groups, total cost-per-episode of outpatient visits and  
189 hospitalizations was \$25.92–198.13 and \$95.15–2202.74 for children, \$38.17–164.52 and \$282.37–  
190 2729.25 for older adults, \$44.13–176.79 and \$847.60–1578.86 for persons with chronic medical  
191 conditions, and \$5.45–36.97 and \$189.98–1088.92 for pregnant persons. Costs across all target groups  
192 were generally higher in UMICs than in LMICs/LICs (**Figure 2**). Nevertheless, indirect costs comprised a  
193 greater proportion of the total costs of outpatient visits compared with hospitalizations, and a greater  
194 proportion of total costs in LMICs/LICs compared with UMICs (**Supplemental Figure S2**). Details on costs  
195 abstracted from each study are described in **Supplemental Table S4**.

196 Four studies evaluated the cost-per-episode for multiple SAGE target groups [33, 38, 45, 50]. Studies  
197 from China and Vietnam found higher hospitalization costs among older adults compared with children  
198 [33, 38, 50], as well as higher costs associated with chronic medical conditions across age groups [33,  
199 38]. In South Africa, total economic burden after incorporating rates of illness was highest for persons  
200 with chronic medical conditions, followed by children, older adults, and pregnant persons [45]. Across all  
201 studies, characteristics that impacted cost-of-illness included urbanicity (rural vs. urban) [33, 38, 47],

202 facility type (public vs. private or level of care provision) [33, 52], and influenza season or circulating  
203 virus type [36, 39]. Only two identified studies quantified disability-adjusted life years [37] or quality-  
204 adjusted life days lost from influenza illness [35].

205 Seven of the 23 studies reported a total national economic burden of influenza illness for either the  
206 general population or specific SAGE target groups (**Table 2**), representing three UMICs (China [40],  
207 Romania [42], and South Africa [44, 45]), two LMICs (Kenya [49] and Ukraine [42]), and one LIC  
208 (Bangladesh [52]). Total annual costs of influenza illness in studies evaluating the general population (no  
209 specified SAGE target group) were equivalent to 0.02–0.19% of the national GDP and 0.32–7.16% of the  
210 national health expenditure; costs for any single target group were <0.01–0.02% of the national GDP  
211 and 0.01–0.42% of the national health expenditure. The highest total costs, as a percent of GDP and  
212 national health expenditure, were reported from Bangladesh [52]. Three studies accounted for non-  
213 medically attended illnesses in the estimation of national economic burden [42, 44, 45].

#### 214 *Program cost studies*

215 Four studies evaluated the cost of influenza vaccination programs (**Table 3**): three with findings from  
216 UMICs (Albania [54], China [55], and Thailand [56]) and one from an LIC (Malawi [57]). Of these, two  
217 evaluated the cost of a program targeting pregnant persons [56, 57], one evaluated a program targeting  
218 healthcare workers [54], and one evaluated a program targeting multiple SAGE target groups (older  
219 adults, persons with chronic medical conditions, children <5 years, pregnant persons, and healthcare  
220 workers) [55]. Two studies used the WHO SIICT [12, 54, 57]. The total annual cost of program was  
221 equivalent to <0.01–0.04% of the national GDP and 0.06–4.78% of the national health expenditure; the  
222 highest proportion of health expenditure was reported in the study vaccinating multiple target groups.  
223 Vaccine procurement represented a large proportion of total costs (89% financial and 44% economic  
224 costs in Albania [54] and 1% financial and 82% economic costs, assuming donated vaccine, in Malawi  
225 [57]). Across studies, the total cost per dose administered ranged from \$0.62–5.20 (financial) and \$0.81–  
226 13.72 (economic), inclusive of vaccine purchase or donation.

#### 227 *Cost-effectiveness studies*

228 Twenty-four studies presented data on cost-effectiveness of influenza vaccination (**Supplemental Table**  
229 **S5**), representing seven UMICs (Argentina [58], China [59-64], Colombia [65], Mexico [66-68], South  
230 Africa [69-71], Thailand [72-76], and Turkiye [77]), four LMICs (Kenya [78], Lao PDR [79], Ukraine [80],



231 and Vietnam [69]), and one LIC (Mali [53]). Twenty (83%) studies evaluated influenza vaccine  
232 introduction (i.e., vaccination compared with no vaccination), two evaluated the effect of increased  
233 vaccination coverage on an existing program, and two evaluated combinations of new introduction and  
234 increased coverage for different target groups. Cost-effectiveness thresholds varied greatly across  
235 studies; most (n=15/24; 63%) used a threshold within one to three times the GDP per capita, three  
236 (13%) used other country-specific thresholds, one (4%) intentionally did not report a threshold, and the  
237 remaining five (21%) did not provide any details about thresholds.

238 Among the 20 studies that evaluated the cost-effectiveness of vaccine introduction, eight provided  
239 results for children, five for older adults, four for persons with chronic conditions, four for pregnant  
240 persons, two for healthcare workers, and one for persons in congregate living settings. Most (83%)  
241 interpreted at least one modeled scenario for each SAGE target group as either cost-effective (based on  
242 designated cost-effectiveness threshold) or cost-saving (ICER<0) (**Figure 3**). The number of studies that  
243 identified results as cost-saving were 3/8 (38%) for children, 1/5 (20%) for older adults, 2/4 (50%) for  
244 persons with chronic medical conditions, 1/4 (25%) for pregnant persons, and 2/2 (100%) for healthcare  
245 workers. Similarly, the number of studies that identified results as cost-effective were 3/8 (38%) for  
246 children, 3/5 (60%) for older adults, 2/4 (50%) for persons with chronic medical conditions, 3/4 (75%) for  
247 pregnant persons, and 1/1 (100%) for persons in congregate living settings. Only three studies  
248 interpreted all modeled scenarios for a particular target group as not cost-effective: 2/8 (25%)  
249 evaluating cost-effectiveness among children [71, 78] and 1/5 (20%) among older adults [64].

250 Two studies assessed the cost-effectiveness of influenza vaccine introduction for multiple target groups;  
251 of these, the target groups with the greatest value-for-money were healthcare workers in Laos (cost-  
252 saving; other groups evaluated were pregnant persons and older adults, found to be cost-effective) [79],  
253 and pregnant persons and persons with chronic medical conditions in South Africa (cost saving; other  
254 groups evaluated were older adults, found to be cost-effective, and children, not found to be cost-  
255 effective) [71]. The three variables most commonly identified to influence the ICER were annual  
256 incidence of influenza (n=9) [53, 58, 59, 69-71, 74, 77, 79], vaccine effectiveness (n=9 studies) [58, 63,  
257 65, 70-73, 77, 79], and cost of vaccine (n=6) [53, 70, 71, 73, 74, 78]; some studies demonstrated that  
258 variation in the attack rate [59, 69, 71, 74] or vaccine effectiveness [71] change the interpretation of  
259 cost-effectiveness results (cost-saving, cost-effective, or not-cost-effective).

260 Additionally, seven papers looked at different prioritization strategies within SAGE target groups by  
261 underlying health conditions [70, 72] or age [58, 59, 73, 75, 78]; among pregnant persons in South  
262 Africa, prioritization of people living with HIV reduced the ICER (though not statistically significant) [70],  
263 and among persons with underlying coronary heart disease in Thailand, restricting to only persons with  
264 angina reduced the ICER, whereas restricting to persons with cardiac arrest/myocardial infarction  
265 increased the ICER (no longer cost-effective) [72]. Results by age were also mixed; two studies among  
266 children found lower ICERs for vaccinating younger children (6–23 months vs. 2–5 years or 6–14 years in  
267 Kenya [78] and 6–59 months vs. 5–14 years in China [59]), two studies among children found lower  
268 ICERs for vaccinating wider age ranges (6 months–5 years vs. 6–23 months or 6–36 months in Argentina  
269 [58]) or older children (12–17 years vs. 2–5 years or 6–11 years in Thailand [73]), and a study among  
270 persons with underlying heart disease in Thailand found a lower ICER for persons aged  $\geq 50$  years  
271 compared with  $\geq 40$  years or  $\geq 60$  years [75].

## 272 **Discussion**

273 The 50 studies identified in this review suggest an increased momentum to generate economic evidence  
274 about influenza illness and vaccination from low- and middle-income countries during 2012 – 2021; a  
275 previous review using a similar search strategy identified only 22 cost-of-illness or cost-effectiveness  
276 studies from low- and middle-income countries [15], and another identified nine cost-  
277 effectiveness/cost-benefit/cost-utility studies [13], both prior to 2012. The release of updated tools and  
278 guidance by WHO, as well as technical and financial support by WHO, CDC, and other international  
279 partners, have facilitated this expansion of the evidence base, emphasizing the utility of global and  
280 multinational collaborations in strengthening influenza vaccination programs worldwide. Recent  
281 additions to the literature include studies from LMIC/LICs, studies representing Sub-Saharan Africa,  
282 South Asia, and middle-income European countries, and studies focused on pregnant persons; none of  
283 these were represented in the previous reviews, which only identified data from UMICs in East Asia,  
284 Latin America, and Europe [13, 15]. However, disparities remain by income group and region; LICs are  
285 still very underrepresented, and no studies from low- and middle-income countries in the Middle East  
286 and North Africa region were identified in our review.

287 Additionally, pregnant persons, healthcare workers, and persons in congregate living settings remain  
288 especially underrepresented in economic evaluations. Healthcare workers are of particular interest  
289 because of the potential benefit of vaccination to themselves and the greater health system [81]; in

290 2018, Gavi, the Vaccine Alliance, expressed interest in assessing the feasibility and impact of routine  
291 influenza immunization of healthcare workers to support epidemic and pandemic influenza  
292 preparedness [82]. Additionally, the Gavi 5.1 strategy, presented in December 2022 [83], included a  
293 strategic focus on enhancing outbreak and pandemic response, to which healthcare worker vaccination  
294 might contribute. To date, global literature about cost-effectiveness and other evidence for influenza  
295 vaccination among healthcare workers remains limited [81, 84], but notably, we identified both a cost-  
296 saving result for healthcare worker vaccination in Lao PDR [79] and in Ukraine [80], suggesting high  
297 value-for-money. Additional data are needed to strengthen the evidence to optimize influenza  
298 vaccination in this target group.

299 Among all cost-of-illness studies, we found that the cost-per-episode estimates for influenza outpatient  
300 visits and hospitalizations varied widely. Per-episode costs were generally greater in higher income  
301 settings (i.e., UMICs compared with LMICs/LICs), likely reflecting higher costs of care, but the national  
302 economic burden among the general population, which ranged from <1%–7% of the national health  
303 expenditure, was highest in an LIC (Bangladesh [52]). More studies from LICs are needed to further  
304 evaluate disparities among income groups. As recommended by WHO, many studies used data from  
305 ILI/SARI sentinel surveillance sites for estimating economic burden; these surveillance systems can serve  
306 as a valuable data source but are not typically designed to capture non-medically attended illnesses [85]  
307 or non-respiratory disease outcomes [86], thereby likely underestimating the true economic burden of  
308 influenza. In South Africa for example, estimates obtained among patients meeting a SARI/ILI case  
309 definition underestimated the total economic burden by approximately 65% [44]; thus, comprehensive  
310 strategies and innovative strategies are needed to better characterize economic burden. Finally,  
311 characteristics of the underlying population in a particular setting, such as age structure and prevalence  
312 of underlying medical conditions, might affect costs across target groups; for example, in South Africa,  
313 where the highest burden was in individuals with chronic medical conditions, this was impacted by HIV  
314 and TB prevalence in the population [44, 45]. Thus, economic evaluations that address multiple target  
315 groups in a particular setting, rather than a single target group, can provide valuable evidence to inform  
316 local vaccination policy; given limited resources for vaccination programs, such comparisons could assist  
317 with target group prioritization.

318 We identified only four program cost studies within the last 10 years, indicating a need for more  
319 evaluations in low- and middle-income countries. Vaccine delivery cost studies can provide direct  
320 evidence to policymakers to make decisions on vaccine introduction, plan budgets and financing

321 strategies for rollout, and identify efficiencies in service delivery [87]. In fact, the WHO SICT [12] and  
322 other costing methods can be used even in the absence of an existing program, as performed in Malawi  
323 [57]. The four studies that we identified indicated that influenza vaccination programs generally cost a  
324 small fraction compared to the national GDP ( $\leq 0.04\%$  in these studies) or national health expenditure  
325 ( $\leq 1\%$  per each individual target group covered in these studies). Vaccine procurement was a major  
326 driver of program costs in both studies that disaggregated this component, representing 82% of the  
327 economic costs (including the value of donated resources) of the hypothetical maternal vaccination  
328 program using donated vaccine in Malawi [57], and 89% of the financial and 44% of the economic costs  
329 of a healthcare worker vaccination program utilizing a combination of government-procured and  
330 donated vaccines in Albania [54]. This underscores the importance of sustainable financing and  
331 procurement strategies to support access to influenza vaccines and enable successful program  
332 implementation, consistent with lessons learned from other vaccine introductions [88]. Again, as costs  
333 may vary across target groups, evaluating program costs in multiple groups within a given country  
334 context could provide useful data for resource prioritization.

335 Among cost-effectiveness studies identified in this review, most reported at least one cost-saving or  
336 cost-effective vaccination scenario per target group assessed; however, results were significantly  
337 impacted by variables such as influenza incidence, vaccine effectiveness, cost of vaccine, and vaccine  
338 coverage, as well as by prioritization within target groups (e.g., by age or specific underlying health  
339 conditions). Strategies to address this variability include use of at least 5 years of data to assess disease  
340 burden, if available, and use of sensitivity analyses among ranges of plausible values, for example  
341 including vaccine effectiveness estimates from years with high and low vaccine match [11]. Future  
342 studies could use innovative approaches to more completely characterize the total disease and  
343 economic burden of influenza, as well as additional endpoints for vaccine effectiveness (illness  
344 attenuation) and indirect protection from vaccination [7]. Finally, the use of appropriate cost-  
345 effectiveness thresholds in low- and middle-income settings warrants further discussion [89, 90]. In our  
346 review, among only three studies that did not identify any cost-effective scenarios, two used a cost-  
347 effectiveness threshold less than GDP per capita [71, 78]; however, using 1–3 times GDP per capita  
348 would have resulted in a cost-effective result in both. Use of context-specific thresholds reflecting local  
349 preferences [91], such as local health opportunity costs [92], might provide more valuable information  
350 to guide investment decisions than thresholds of 1–3 times GDP per capita [89, 90, 93, 94].

351 This review is subject to several notable limitations. First, the inclusion/exclusion criteria used (e.g.,  
352 estimates derived from LCI or ILI/SARI case definition; no comparison of vaccine formulations)  
353 undercount the total number of economic studies from low- and middle-income countries within the  
354 past 10 years. Multiple other studies have evaluated costs of acute respiratory illness, of which influenza  
355 is an important etiology, or addressed other economic questions, such as the cost-effectiveness of  
356 quadrivalent vs. trivalent vaccine [23, 95], and were not captured here. Influenza illness might also  
357 present as non-respiratory outcomes [86], and thus the economic burden of influenza is underestimated  
358 in most studies that restrict to syndromic surveillance for ILI/SARI [85]. Second, target group definitions  
359 vary across countries, with variation in age cut-offs for children and older adults and prioritization of  
360 specific chronic medical conditions, but all results per target group were summarized together in this  
361 review due to the small numbers of publications, potentially missing nuances of within-group  
362 differences. Relatedly, although SAGE recommendations specifically reference children aged <5 years  
363 [1], all publications with data for children aged <18 years were included. Finally, we found substantial  
364 heterogeneity in the methodology and data inputs used across studies; in fact, as discussed previously,  
365 influenza itself intrinsically varies in annual incidence, disease severity, and vaccine effectiveness across  
366 seasons. As previously discussed, we did not conduct meta-analyses because of this variability, though  
367 methods for meta-analysis of economic data are available [96] and have been used in other reviews that  
368 focus predominantly on high-income settings [21].

369 This review also uncovered opportunities to provide evidence on policy-relevant questions that  
370 currently have limited evidence. First, we did not identify any studies taking an employer payer's  
371 perspective; however, studies utilizing this approach could provide valuable policy-relevant information  
372 to encourage vaccination among employees or to encourage employer-supported vaccination programs  
373 [97] as a pathway to broader influenza vaccine availability. Second, few studies quantified preference-  
374 based outcomes such as disability-adjusted life years [40] or quality-adjusted life days from influenza  
375 illness [38]; continued efforts for valuation of these outcomes could inform context-specific inputs for  
376 future cost-effectiveness analyses. Third, we only identified one included study that evaluated cost-  
377 effectiveness of influenza vaccination coadministered with another vaccine (pneumococcal vaccine)  
378 [65]; a few additional studies addressing coadministration were excluded because they did not provide  
379 results for influenza vaccination alone. Given opportunities to coadminister influenza vaccine with other  
380 vaccines across the life course, including COVID-19 vaccine [98], evaluation of shared costs in program  
381 cost or cost-effectiveness studies might incentivize integrated vaccine implementation. Fourth, we

382 found only two studies that considered non-respiratory disease outcomes (cardiovascular disease  
383 events) in cost-effectiveness analyses, both among persons with underlying heart disease in Thailand  
384 [72, 75]; as previously discussed, inclusion of non-respiratory disease outcomes could better  
385 characterize the full impact of influenza vaccination [86]. Similarly, innovative strategies might address  
386 the broader impact of vaccines, such as impact on childhood development, household behavior,  
387 economic growth, political stability, and health equity [99, 100]

## 388 **Conclusions**

389 Continued evaluation of costs and cost-effectiveness is useful to drive evidence-based vaccine policy  
390 development, implementation, and refinement and global investment in influenza vaccination.  
391 Additional studies from low-income countries and underrepresented target groups (e.g., pregnant  
392 persons, healthcare workers, and persons in congregate living settings) would strengthen the evidence  
393 of value-for-money. Standardization of research agenda [1] and methodology across future evaluations,  
394 including considerations to capture the full spectrum of influenza-associated illness, could allow for  
395 pooled estimates and meta-analyses. Global, regional, and country-specific data on the economics of  
396 vaccination, including costs of vaccination programs, costs of avertable illnesses, and cost-effectiveness,  
397 are instrumental for policymaking, resource allocation, and investment for expanded and sustainable  
398 influenza vaccination programs.

## 399 **Acknowledgements**

400 We thank Rakhat Akmatova, Silvia Bino, and Tat Yao for screening of non-English publications; Britni  
401 Burkhardtsmeier for administrative project support; Joanna Taliano for search strategy support; and  
402 Chris Chadwick, Stefano Tempia, and members of the Partnership for Influenza Vaccine Introduction  
403 (PIVI) technical working group for their insightful review and suggestions.

## 404 **Disclaimer**

405 The findings and conclusions in this report are those of the authors and do not necessarily represent the  
406 official position of the US Centers for Disease Control and Prevention.

Figure 1: PRISMA flow diagram of study selection process

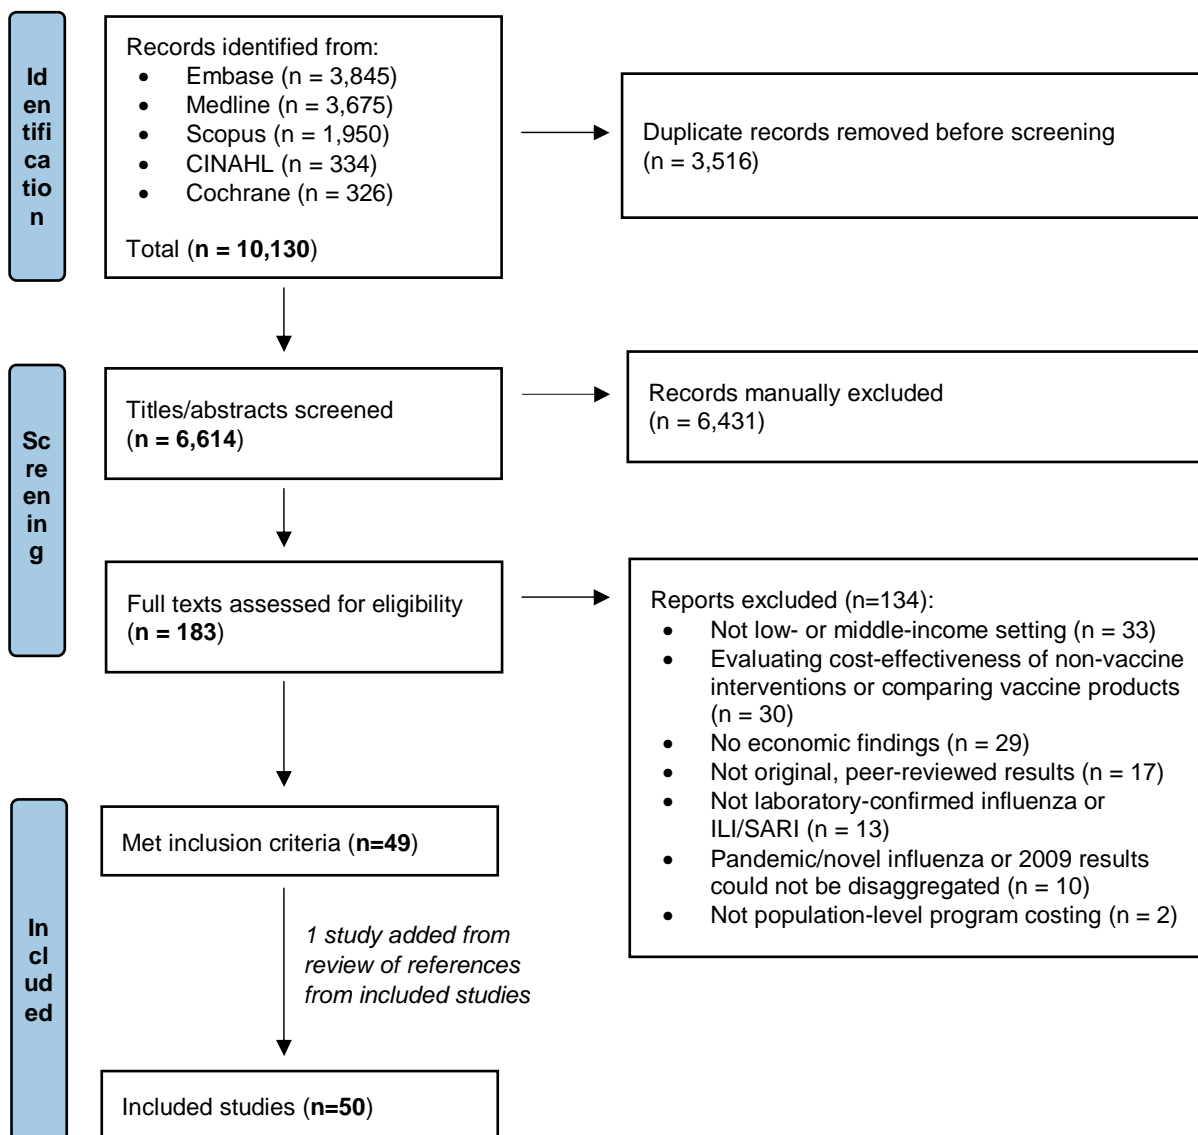

**Table 1: Number of included studies by income group classification, region, Strategic Advisory Committee of Experts on Immunization (SAGE) target group, and study type**

| Income group and region                     | Total no. studies included | Total no. countries represented | No. studies by SAGE target group <sup>1</sup> |                       |              |                                         |                  |          |                                       | No. studies by study type |                 |                       |
|---------------------------------------------|----------------------------|---------------------------------|-----------------------------------------------|-----------------------|--------------|-----------------------------------------|------------------|----------|---------------------------------------|---------------------------|-----------------|-----------------------|
|                                             |                            |                                 | None (general population)                     | Children <sup>2</sup> | Older adults | Persons with chronic medical conditions | Pregnant persons | HCWs     | Persons in congregate living settings | Cost-of-illness           | Cost-of-program | Cost-effectiveness    |
| <b>Total</b>                                | <b>50<sup>3</sup></b>      | <b>20<sup>4</sup></b>           | <b>13</b>                                     | <b>26</b>             | <b>16</b>    | <b>12</b>                               | <b>8</b>         | <b>4</b> | <b>1</b>                              | <b>23<sup>5</sup></b>     | <b>4</b>        | <b>24<sup>5</sup></b> |
| <b>Upper-middle income countries (UMIC)</b> | <b>40</b>                  | <b>11</b>                       | <b>7</b>                                      | <b>22</b>             | <b>13</b>    | <b>11</b>                               | <b>5</b>         | <b>2</b> | <b>1</b>                              | <b>17</b>                 | <b>3</b>        | <b>20</b>             |
| East Asia & Pacific                         | 24                         | 2                               | 3                                             | 14                    | 9            | 7                                       | 2                | 1        | 1                                     | 11                        | 2               | 11                    |
| Latin America & Caribbean                   | 7                          | 4                               | 2                                             | 6                     | 0            | 1                                       | 0                | 0        | 0                                     | 2                         | 0               | 5                     |
| Sub-Saharan Africa                          | 5                          | 1                               | 2                                             | 2                     | 2            | 2                                       | 3                | 0        | 0                                     | 2                         | 0               | 3                     |
| Europe & Central Asia                       | 4                          | 4                               | 0                                             | 0                     | 2            | 1                                       | 0                | 1        | 0                                     | 2                         | 1               | 1                     |
| <b>Lower-middle income countries (LMIC)</b> | <b>11</b>                  | <b>7</b>                        | <b>5</b>                                      | <b>4</b>              | <b>3</b>     | <b>1</b>                                | <b>1</b>         | <b>2</b> | <b>0</b>                              | <b>7</b>                  | <b>0</b>        | <b>4</b>              |
| East Asia & Pacific                         | 5                          | 3                               | 4                                             | 1                     | 2            | 0                                       | 1                | 1        | 0                                     | 3                         | 0               | 2                     |
| Sub-Saharan Africa                          | 2                          | 1                               | 1                                             | 2                     | 0            | 0                                       | 0                | 0        | 0                                     | 1                         | 0               | 1                     |
| Europe & Central Asia                       | 2                          | 1                               | 0                                             | 0                     | 1            | 0                                       | 0                | 1        | 0                                     | 1                         | 0               | 1                     |
| Latin America & Caribbean                   | 1                          | 1                               | 0                                             | 1                     | 0            | 0                                       | 0                | 0        | 0                                     | 1                         | 0               | 0                     |
| South Asia                                  | 1                          | 1                               | 0                                             | 0                     | 0            | 1                                       | 0                | 0        | 0                                     | 1                         | 0               | 0                     |
| <b>Low-income countries (LIC)</b>           | <b>3</b>                   | <b>3</b>                        | <b>1</b>                                      | <b>0</b>              | <b>0</b>     | <b>0</b>                                | <b>2</b>         | <b>0</b> | <b>0</b>                              | <b>2</b>                  | <b>1</b>        | <b>1</b>              |
| Sub-Saharan Africa                          | 2                          | 2                               | 0                                             | 0                     | 0            | 0                                       | 2                | 0        | 0                                     | 1                         | 1               | 1                     |
| South Asia                                  | 1                          | 1                               | 1                                             | 0                     | 0            | 0                                       | 0                | 0        | 0                                     | 1                         | 0               | 0                     |

<sup>1</sup>Vaccination target groups as defined in WHO SAGE guidance [1]. Several studies reported data on >1 target group.

<sup>2</sup>Although SAGE recommendations specifically reference children aged <5 years [1], publications with data for children aged <18 years were included.

<sup>3</sup>Three studies [42, 43, 69] included countries from multiple income groups and/or regions.

<sup>4</sup>One country (China) changed income classification from LMIC to UMIC in 2010 and was counted in both groups corresponding to studies assessing time periods before and after this year.

<sup>5</sup>One study [53] reported original data for both cost-of-illness and cost-effectiveness.



**Figure 2: Total costs-per-episode<sup>1</sup> of influenza illness, by disease severity (outpatient vs. hospitalized)<sup>2</sup>, income group, and Strategic Advisory Committee of Experts on Immunization (SAGE) target group<sup>3</sup>, in low- and middle-income countries**

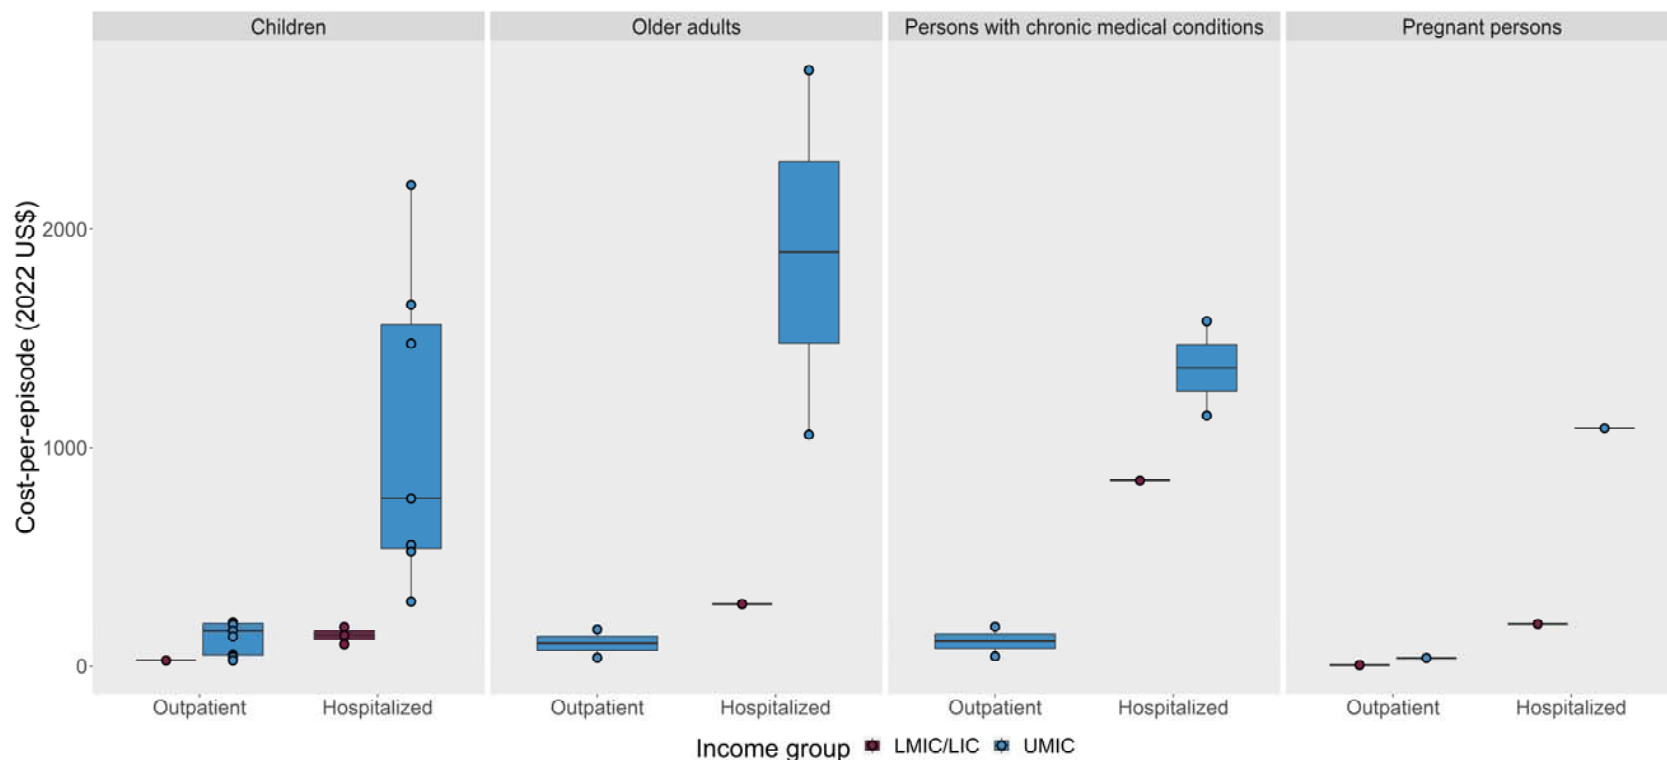

All costs presented in 2022 US\$.

Abbreviations: LIC, low-income country; LMIC, lower-middle income country; UMIC, upper-middle income country; US\$, US Dollars.

<sup>1</sup>Total costs inclusive of direct and indirect costs; direct costs were all medical and non-medical costs directly attributable to patient care. Indirect costs were all costs not directly attributable to patient care (e.g., lost earnings or lost productivity). Median costs were preferentially abstracted from source publications; if unavailable, mean costs were abstracted.

<sup>2</sup>No included papers reported hospitalization costs for older adults or persons with chronic medical conditions in LMIC/LIC.

<sup>3</sup>No cost-of-illness papers were identified for healthcare workers or individuals in congregate living settings in low- and middle-income countries.

**Table 2: National economic burden of influenza illness, by Strategic Advisory Committee of Experts on Immunization (SAGE) target group<sup>1</sup>, in low- and middle-income countries**

| Income group                                   | Study              | Country      | Target group details                  | Data source for national extrapolation | Study period | Perspective        | Total annual cost (2022 US\$, millions) <sup>2</sup> | Total annual cost as % of total national GDP <sup>2,3</sup> | Total annual cost as % of national health expenditure <sup>2,4</sup> |
|------------------------------------------------|--------------------|--------------|---------------------------------------|----------------------------------------|--------------|--------------------|------------------------------------------------------|-------------------------------------------------------------|----------------------------------------------------------------------|
| <b>General population</b>                      |                    |              |                                       |                                        |              |                    |                                                      |                                                             |                                                                      |
| UMIC                                           | Tempia, 2019 [44]  | South Africa | All ages                              | 7 sentinel hospitals and 2 clinics     | 2013–15      | Societal           | \$322.62 <sup>5</sup>                                | 0.09%                                                       | 1.16%                                                                |
| UMIC                                           | Gong, 2021 [40]    | China        | All ages                              | Not reported                           | 2006–19      | Societal           | \$4249.40                                            | 0.03%                                                       | 0.55%                                                                |
| LMIC <sup>6</sup>                              | Emukule, 2019 [49] | Kenya        | All ages                              | 4 sentinel hospitals and 1 clinic      | 2013–14      | Societal           | \$10.76–38.26                                        | 0.02–0.06%                                                  | 0.32–1.14%                                                           |
| LIC <sup>7</sup>                               | Bhuiyan, 2014 [52] | Bangladesh   | All ages                              | 4 sentinel hospitals                   | 2010         | Societal           | \$219.68                                             | 0.19%                                                       | 7.16%                                                                |
| <b>Children<sup>8</sup></b>                    |                    |              |                                       |                                        |              |                    |                                                      |                                                             |                                                                      |
| UMIC                                           | Tempia, 2020 [45]  | South Africa | 6–59 months                           | 7 sentinel hospitals and 2 clinics     | 2013–15      | Societal           | \$39.97 <sup>5</sup>                                 | 0.01%                                                       | 0.14%                                                                |
| LMIC <sup>6</sup>                              | Emukule, 2019 [49] | Kenya        | <5 years                              | 4 sentinel hospitals and 1 clinic      | 2013–14      | Societal           | \$6.19–14.21                                         | 0.01–0.02%                                                  | 0.18–0.42%                                                           |
| <b>Older adults</b>                            |                    |              |                                       |                                        |              |                    |                                                      |                                                             |                                                                      |
| UMIC                                           | Kovacs, 2014 [42]  | Romania      | ≥65 years                             | 26 sentinel hospitals                  | 2011–12      | Payer <sup>9</sup> | \$0.68 <sup>5</sup>                                  | <0.01%                                                      | 0.01%                                                                |
| UMIC                                           | Tempia, 2020 [45]  | South Africa | ≥65 years                             | 7 sentinel hospitals and 2 clinics     | 2013–15      | Societal           | \$18.75                                              | 0.01%                                                       | 0.07%                                                                |
| LMIC                                           | Kovacs, 2014 [42]  | Ukraine      | ≥65 years                             | 10 sentinel hospitals                  | 2011–12      | Payer <sup>9</sup> | \$0.79                                               | <0.01%                                                      | 0.01%                                                                |
| <b>Persons with chronic medical conditions</b> |                    |              |                                       |                                        |              |                    |                                                      |                                                             |                                                                      |
| UMIC                                           | Tempia, 2020 [45]  | South Africa | 5–64 years with HIV, TB, or other UMC | 7 sentinel hospitals and 2 clinics     | 2013–15      | Societal           | \$102.15 <sup>5</sup>                                | 0.03%                                                       | 0.37%                                                                |
| <b>Pregnant persons</b>                        |                    |              |                                       |                                        |              |                    |                                                      |                                                             |                                                                      |
| UMIC                                           | Tempia, 2020 [45]  | South Africa | NA                                    | 7 sentinel hospitals and 2 clinics     | 2013–15      | Societal           | \$7.24 <sup>5</sup>                                  | <0.01%                                                      | 0.03%                                                                |

Abbreviations: GDP, gross domestic product; HIV, human immunodeficiency virus; ILL, influenza-like illness; LCI, laboratory-confirmed influenza; LIC, low-income country; LMIC, lower-middle income country; NA, not applicable; SARI, severe acute respiratory infection; TB, tuberculosis; UMC, underlying medical condition; UMIC, upper-middle income country; US\$, US Dollars.

- <sup>1</sup>No cost-of-illness papers were identified for healthcare workers or individuals in congregate living settings in low- and middle-income countries.
- <sup>2</sup>Calculated values not reported in source publication.
- <sup>3</sup>National GDP obtained from World Bank [24], reported for final year of study period.
- <sup>4</sup>Current Health Expenditure obtained from World Health Organization [27], reported for final year of study period.
- <sup>5</sup>Included estimation of non-medically attended illnesses.
- <sup>6</sup>Kenya changed classification from LIC to LMIC in 2014, during the study period [24], and was thus classified as LMIC.
- <sup>7</sup>Bangladesh changed classification from LIC to LMIC in 2014, after the study period [24], and was thus classified as LIC.
- <sup>8</sup>Although SAGE recommendations specifically reference children aged <5 years [1], publications with data for children aged <18 years were included.
- <sup>9</sup>No indirect costs were included in the total estimate because of study perspective. The specific payer was not specified in the source publication.

**Table 3: Costs of national influenza vaccination programs in low- and middle-income countries**

| Income group | Study                | Country  | Study characteristics               |                                                            |                                                                                                                                                         |               | Scenario characteristics                                                                                                                     |                         |                                                                   | Base scenario results                                       |                                                                    |                                                          |                                                                                                                                          |
|--------------|----------------------|----------|-------------------------------------|------------------------------------------------------------|---------------------------------------------------------------------------------------------------------------------------------------------------------|---------------|----------------------------------------------------------------------------------------------------------------------------------------------|-------------------------|-------------------------------------------------------------------|-------------------------------------------------------------|--------------------------------------------------------------------|----------------------------------------------------------|------------------------------------------------------------------------------------------------------------------------------------------|
|              |                      |          | Program year(s) costed <sup>1</sup> | Costing tool/method used                                   | SAGE target group                                                                                                                                       | Perspective   | Base scenario: vaccine formulation and cost assumptions                                                                                      | Base scenario: coverage | Additional scenarios modeled                                      | Total annual cost as % of total national GDP <sup>2,3</sup> | Total annual cost as % of national health expenditure <sup>4</sup> | Vaccine procurement cost <sup>5</sup> as % of total cost | Cost per dose administered (2022 US\$)                                                                                                   |
| UMIC         | Yang 2016 [55]       | China    | 2015 (1 year)                       | Budget impact analysis using secondary data inputs         | <b>Multiple:</b> (1) older adults ≥60y; (2) persons with chronic medical conditions; (3) children <5y; (4) pregnant persons; and (5) healthcare workers | Govt.         | TIV for 0.25 ml formulation (infants aged 6–35 months) and \$7.17 per dose for 0.50 ml formulation (all ages >35 months)                     | 20%                     | Varied vaccine uptake and wastage rate                            | 0.01%                                                       | 4.78%                                                              | NR                                                       | NR                                                                                                                                       |
| UMIC         | Riewpaibon 2021 [56] | Thailand | 2018 (1 year)                       | Micro-costing approach sampling district health facilities | <b>Pregnant persons</b>                                                                                                                                 | Health system | Unspecified seasonal vaccine: cost not reported                                                                                              | NR                      | NR                                                                | NR                                                          | NR                                                                 | NR                                                       | \$0.81–11 (economic range across health facilities)                                                                                      |
| UMIC         | Pallas 2020 [54]     | Albania  | 2018–19 (1 season)                  | SICT <sup>6</sup> micro-costing approach                   | <b>Healthcare workers</b>                                                                                                                               | Govt.         | TIV: \$4.54/dose for donated single-dose vial presentation; \$5.30/dose for government-purchased single-dose pre-filled syringe presentation | 70%                     | Varied vaccine coverage, vaccine presentation, and purchase price | <0.01%                                                      | 0.06%                                                              | 89% (financial), 44% (economic)                          | \$0.56 (financial), \$7.68 (economic) excluding vaccine procurement \$5.20 (financial), \$13.72 (economic) including vaccine procurement |
| LIC          | Pecenka 2017 [57]    | Malawi   | 2018–22 (5 years)                   | SICT <sup>6</sup> micro-                                   | <b>Pregnant persons</b>                                                                                                                                 | Govt.         | Unspecified seasonal vaccine:                                                                                                                | 47%                     | Varied vaccine                                                    | 0.04%                                                       | 1.09%                                                              | 1% (financial),                                          | \$0.62 (financial),                                                                                                                      |

medRxiv preprint doi: <https://doi.org/10.1101/2023.05.08.23289683>; this version posted May 8, 2023. The copyright holder for this preprint (which was not certified by peer review) is the author/funder, who has granted medRxiv a license to display the preprint in perpetuity. It is not subject to copyright. For use under aCC-BY 4.0 International license.

|                  |                                                                                                                   |                           |                                         |                                            |
|------------------|-------------------------------------------------------------------------------------------------------------------|---------------------------|-----------------------------------------|--------------------------------------------|
| costing approach | \$0/dose (financial cost) and \$2.90/dose (economic cost) for donated single dose pre-filled vaccine presentation | uptake and purchase price | 82% (economic) assuming donated vaccine | \$5.46 (economic) assuming donated vaccine |
|------------------|-------------------------------------------------------------------------------------------------------------------|---------------------------|-----------------------------------------|--------------------------------------------|

Abbreviations: Govt., government; LMIC, lower-middle income country; NR, not reported; SAGE, Strategic Advisory Group of Experts on Immunization; SIICT, Seasonal Influenza Immunization Costing Tool; TIV, trivalent influenza vaccine; UMIC, upper-middle income country; US\$, US Dollars; WHO, World Health Organization.

<sup>1</sup>Program years could be defined by calendar year or influenza season and are designated accordingly.

<sup>2</sup>National GDP obtained from World Bank [24], reported for final program year costed. Economic program costs were used for the calculation if both financial and economic total costs were reported.

<sup>3</sup>Calculated values not reported in source publication.

<sup>4</sup>Percent of government health expenditure was obtained from the source publication if reported (Pallas and Yang); else, Domestic General Government Health Expenditure obtained from World Health Organization [27]. Economic program costs were used for the calculation if both financial and economic total costs were reported.

<sup>5</sup>Vaccine procurement cost includes cost of vaccine and vaccination supplies.

<sup>6</sup>The “WHO Flutool for planning and costing maternal influenza vaccination” was originally released in 2016; in 2019, the updated “Flutool plus – Seasonal Influenza Immunization Costing Tool (SIICT)” was released and allowed for influenza vaccination cost estimation in additional target groups [12]. Both tools are referred to as “SIICT” in this table.

**Figure 3: Cost-effectiveness results of studies evaluating influenza vaccination<sup>1</sup>, by Strategic Advisory Committee of Experts on Immunization (SAGE) target group, in low- and middle-income countries**

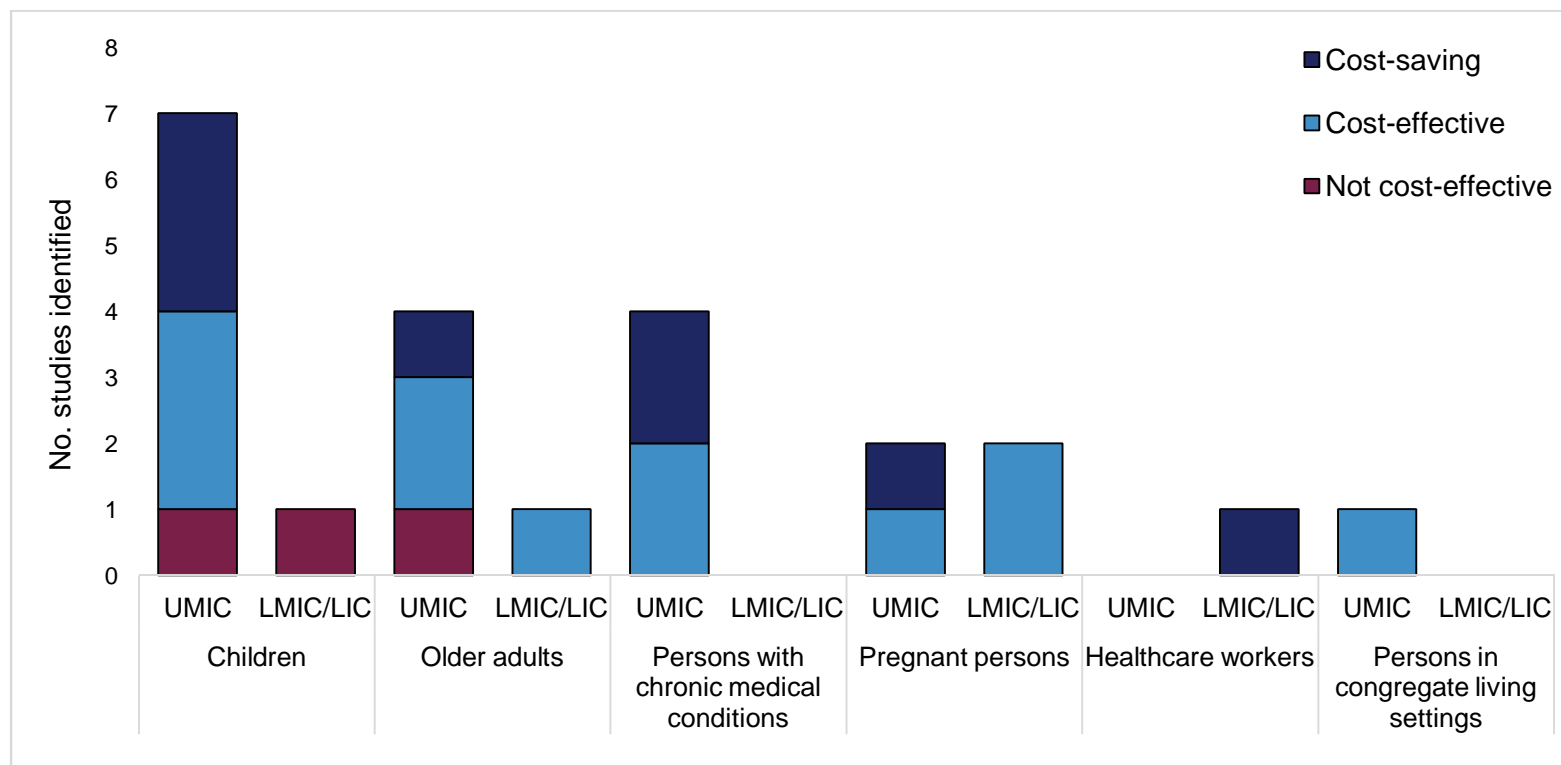

Abbreviations: LIC, low-income country; LMIC, lower-middle income country; UMIC, upper-middle income country.

<sup>1</sup>Only includes studies comparing cost-effectiveness of influenza vaccination vs. no vaccination. Additional studies examining cost-effectiveness of modifications to a current vaccination program (e.g., increased coverage) are described in Supplemental Table S5. Categorization is based on the interpretation provided in the original study; if any modeled intervention was interpreted as cost-saving (ICER<0), the study was characterized as “cost-saving” and if any modeled intervention was interpreted as cost-effective, the study was characterized as “cost-effective.” Interpretations of highly cost-effective and cost-effective were both combined as “cost-effective.” Details on each scenario are provided in Supplemental Table S5.

## Supplementary materials

**Table S1: Search terms for systematic review, by database**

| Database                    | Strategy                                                                                                                                                                                       | Run Date   |
|-----------------------------|------------------------------------------------------------------------------------------------------------------------------------------------------------------------------------------------|------------|
| <b>Medline (OVID) 1946-</b> | (influenza* OR flu OR H1N1)<br>AND<br>Cost* OR economic* OR ec.fs<br>AND<br>Exp Animals/ NOT exp humans/<br><br>2012 - 2021                                                                    | 01/31/2022 |
| <b>Embase (OVID) 1974-</b>  | Exp Influenza/ OR (influenza* OR flu OR H1N1).ti,ab.<br>AND<br>Cost* OR economic*<br>AND<br>Exp Animal/ NOT exp human/<br>NOT<br>Conference abstract.pt<br><br>2012 – 2021; not Pubmed/Medline | 01/31/2022 |
| <b>Cochrane Library</b>     | (influenza* OR flu OR H1N1):ti,ab<br>AND<br>(Cost* OR economic*):ti,ab<br><br>2012 – 2021                                                                                                      | 01/31/2022 |
| <b>CINAHL (EbscoHost)</b>   | (TI (influenza* OR flu OR H1N1)) OR (AB (influenza* OR flu OR H1N1))<br>AND<br>(TI (Cost* OR economic*)) OR (AB (Cost* OR economic*))<br><br>2012 – 2021; exclude Medline records              | 01/31/2022 |
| <b>Scopus</b>               | TITLE-ABS-KEY(influenza* OR flu OR H1N1) AND TITLE-ABS-KEY(Cost* OR economic*) AND NOT INDEX(medline)<br><br>2012 – 2021                                                                       | 01/31/2022 |

**Table S2: Modified Consolidated Health Economic Evaluation Reporting Standard (CHEERS) criteria<sup>1</sup> used for quality assessment**

| CHEERS criterion                                       | Description                                                                                                                                                                                                                                                                                                                                                                                                                                                                                                                                                                   | Evaluated for cost-of-illness studies | Evaluated for cost-of-program studies | Evaluated for cost-effectiveness studies        |
|--------------------------------------------------------|-------------------------------------------------------------------------------------------------------------------------------------------------------------------------------------------------------------------------------------------------------------------------------------------------------------------------------------------------------------------------------------------------------------------------------------------------------------------------------------------------------------------------------------------------------------------------------|---------------------------------------|---------------------------------------|-------------------------------------------------|
| Title                                                  | Identify the study as an economic evaluation or use more specific terms such as “cost-effectiveness analysis”, and describe the interventions compared.                                                                                                                                                                                                                                                                                                                                                                                                                       | ?                                     | ?                                     | ?                                               |
| Abstract                                               | Provide a structured summary of objectives, perspective, setting, methods (including study design and inputs), results (including base case and uncertainty analyses), and conclusions.                                                                                                                                                                                                                                                                                                                                                                                       | ?                                     | ?                                     | ?                                               |
| Background and objectives                              | Provide an explicit statement of the broader context for the study. Present the study question and its relevance for health policy or practice decisions.                                                                                                                                                                                                                                                                                                                                                                                                                     | ?                                     | ?                                     | ?                                               |
| Target population and subgroups                        | Describe characteristics of the base case population and subgroups analyzed, including why they were chosen.                                                                                                                                                                                                                                                                                                                                                                                                                                                                  | ?                                     | ?                                     | ?                                               |
| Setting and location                                   | State relevant aspects of the system(s) in which the decision(s) need(s) to be made.                                                                                                                                                                                                                                                                                                                                                                                                                                                                                          | ?                                     | ?                                     | ?                                               |
| Study perspective                                      | Describe the perspective of the study and relate this to the costs being evaluated.                                                                                                                                                                                                                                                                                                                                                                                                                                                                                           | ?                                     | ?                                     | ?                                               |
| Comparators                                            | Describe the interventions or strategies being compared and state why they were chosen.                                                                                                                                                                                                                                                                                                                                                                                                                                                                                       |                                       |                                       | ?                                               |
| Time horizon                                           | State the time horizon(s) over which costs and consequences are being evaluated and say why appropriate.                                                                                                                                                                                                                                                                                                                                                                                                                                                                      |                                       | ?                                     | ?                                               |
| Discount rate                                          | Report the choice of discount rate(s) used for costs and outcomes and say why appropriate.                                                                                                                                                                                                                                                                                                                                                                                                                                                                                    |                                       | ?                                     | ?                                               |
| Choice of health outcomes                              | Describe what outcomes were used as the measure(s) of benefit in the evaluation and their relevance for the type of analysis performed.                                                                                                                                                                                                                                                                                                                                                                                                                                       |                                       |                                       | ?                                               |
| Measurement of effectiveness                           | Describe fully the design features of the single effectiveness study and why the single study was a sufficient source of clinical effectiveness data. <b>OR</b><br>Describe fully the methods used for identification of included studies and synthesis of clinical effectiveness data.                                                                                                                                                                                                                                                                                       |                                       |                                       | ?                                               |
| Measurement and valuation of preference-based outcomes | If applicable, describe the population and methods used to elicit preferences for outcomes                                                                                                                                                                                                                                                                                                                                                                                                                                                                                    |                                       |                                       | ?<br><i>(if QALY or DALY results presented)</i> |
| Estimating resources and costs                         | Describe approaches used to estimate resource use associated with the alternative interventions. Describe primary or secondary research methods for valuing each resource item in terms of its unit cost. Describe any adjustments made to approximate to opportunity costs. <b>OR</b><br>Describe approaches and data sources used to estimate resource use associated with model health states. Describe primary or secondary research methods for valuing each resource item in terms of its unit cost. Describe any adjustments made to approximate to opportunity costs. | ?                                     | ?                                     | ?                                               |



|                                                                      |                                                                                                                                                                                                                                                                                                                                                                                               |           |           |              |
|----------------------------------------------------------------------|-----------------------------------------------------------------------------------------------------------------------------------------------------------------------------------------------------------------------------------------------------------------------------------------------------------------------------------------------------------------------------------------------|-----------|-----------|--------------|
| Currency, price date, and conversion                                 | Report the dates of the estimated resource quantities and unit costs. Describe methods for adjusting estimated unit costs to the year of reported costs if necessary. Describe methods for converting costs into a common currency base and the exchange rate.                                                                                                                                | ?         | ?         | ?            |
| Choice of model                                                      | Describe and give reasons for the specific type of decision analytical model used. Providing a figure to show model structure is strongly recommended.                                                                                                                                                                                                                                        |           |           | ?            |
| Assumptions                                                          | Describe all structural or other assumptions underpinning the decision-analytical model.                                                                                                                                                                                                                                                                                                      |           |           | ?            |
| Analytical methods                                                   | Describe all analytical methods supporting the evaluation. This could include methods for dealing with skewed, missing, or censored data; extrapolation methods; methods for pooling data; approaches to validate or make adjustments (such as half cycle corrections) to a model; and methods for handling population heterogeneity and uncertainty.                                         | ?         | ?         | ?            |
| Study parameters                                                     | Report the values, ranges, references, and, if used, probability distributions for all parameters. Report reasons or sources for distributions used to represent uncertainty where appropriate. Providing a table to show the input values is strongly recommended.                                                                                                                           | ?         | ?         | ?            |
| Incremental costs and outcomes                                       | For each intervention, report mean values for the main categories of estimated costs and outcomes of interest, as well as mean differences between the comparator groups. If applicable, report incremental cost-effectiveness ratios.                                                                                                                                                        |           |           | ?            |
| Characterizing uncertainty                                           | Describe the effects of sampling uncertainty for the estimated incremental cost and incremental effectiveness parameters, together with the impact of methodological assumptions (such as discount rate, study perspective). <b>OR</b><br>Describe the effects on the results of uncertainty for all input parameters, and uncertainty related to the structure of the model and assumptions. |           |           | ?            |
| Characterizing heterogeneity                                         | If applicable, report differences in costs, outcomes, or cost-effectiveness that can be explained by variations between subgroups of patients with different baseline characteristics or other observed variability in effects that are not reducible by more information.                                                                                                                    |           |           | ?            |
| Study findings, limitations, generalizability, and current knowledge | Summarize key study findings and describe how they support the conclusions reached. Discuss limitations and the generalizability of the findings and how the findings fit with current knowledge.                                                                                                                                                                                             | ?         | ?         | ?            |
| Source of funding                                                    | Describe how the study was funded and the role of the funder in the identification, design, conduct, and reporting of the analysis. Describe other non-monetary sources of support.                                                                                                                                                                                                           | ?         | ?         | ?            |
| Conflicts of interest                                                | Describe any potential for conflict of interest of study contributors in accordance with journal policy. In the absence of a journal policy, we recommend authors comply with International Committee of Medical Journal Editors recommendations.                                                                                                                                             | ?         | ?         | ?            |
| <b>Total possible score</b>                                          |                                                                                                                                                                                                                                                                                                                                                                                               | <b>13</b> | <b>15</b> | <b>23–24</b> |

<sup>1</sup>The full CHEERS criteria assessment [28] was performed for cost-effectiveness studies; a modified set of relevant criteria were assessed for cost-of-illness and cost-of-program studies.

**Table S3: Description of included studies, by country**

| Country                               | Author, year    | Study type                                         | SAGE target group(s)      |          |              |                                         |                  |                    |                                       | Reference |
|---------------------------------------|-----------------|----------------------------------------------------|---------------------------|----------|--------------|-----------------------------------------|------------------|--------------------|---------------------------------------|-----------|
|                                       |                 |                                                    | None (general population) | Children | Older adults | Persons with chronic medical conditions | Pregnant persons | Healthcare workers | Persons in congregate living settings |           |
| <b>Albania (UMIC)</b>                 | Pallas, 2020    | Cost-of-program                                    |                           |          |              |                                         |                  | ☐                  |                                       | [54]      |
| <b>Argentina (UMIC)</b>               | Giglio, 2012    | Cost-effectiveness (or cost-benefit, cost-utility) |                           | ☐        |              |                                         |                  |                    |                                       | [58]      |
| <b>Bangladesh (LIC)</b>               | Bhuiyan, 2014   | Cost-of-illness                                    | ☐                         |          |              |                                         |                  |                    |                                       | [52]      |
| <b>China (LMIC, UMIC)<sup>1</sup></b> | Chen, 2019      | Cost-effectiveness (or cost-benefit, cost-utility) |                           |          | ☐            |                                         |                  |                    |                                       | [60]      |
|                                       | Gong, 2021      | Cost-of-illness                                    | ☐                         |          |              |                                         |                  |                    |                                       | [40]      |
|                                       | Guo, 2012       | Cost-of-illness                                    | ☐                         |          |              |                                         |                  |                    |                                       | [47]      |
|                                       | Jiang, 2020     | Cost-effectiveness (or cost-benefit, cost-utility) |                           |          | ☐            |                                         |                  |                    |                                       | [62]      |
|                                       | Lai, 2021       | Cost-of-illness                                    |                           | ☐        | ☐            | ☐                                       |                  |                    |                                       | [38]      |
|                                       | Wang, 2013      | Cost-of-illness                                    |                           | ☐        |              |                                         |                  |                    |                                       | [31]      |
|                                       | Wang, 2015      | Cost-of-illness                                    |                           | ☐        |              |                                         |                  |                    |                                       | [32]      |
|                                       | Wang, 2019      | Cost-of-illness                                    |                           | ☐        |              |                                         |                  |                    |                                       | [37]      |
|                                       | Wang, 2021      | Cost-of-illness                                    |                           | ☐        |              |                                         |                  |                    |                                       | [39]      |
|                                       | Yan, 2021       | Cost-effectiveness (or cost-benefit, cost-utility) |                           |          | ☐            |                                         |                  |                    |                                       | [64]      |
|                                       | Yang, 2015      | Cost-of-illness                                    | ☐                         | ☐        | ☐            | ☐                                       |                  |                    |                                       | [33]      |
|                                       | Yang, 2016      | Cost-of-program                                    |                           | ☐        | ☐            | ☐                                       | ☐                | ☐                  | ☐                                     | [55]      |
| Yang, 2017                            | Cost-of-illness | ☐                                                  | ☐                         | ☐        | ☐            |                                         |                  |                    | [35]                                  |           |

| Country            | Author, year         | Study type                                                             | SAGE target group(s)      |          |              |                                         |                  |                    |                                       | Reference |
|--------------------|----------------------|------------------------------------------------------------------------|---------------------------|----------|--------------|-----------------------------------------|------------------|--------------------|---------------------------------------|-----------|
|                    |                      |                                                                        | None (general population) | Children | Older adults | Persons with chronic medical conditions | Pregnant persons | Healthcare workers | Persons in congregate living settings |           |
|                    | Yang, 2019           | Cost-effectiveness (or cost-benefit, cost-utility)                     |                           |          |              | ?                                       |                  |                    |                                       | [61]      |
|                    | Yang, 2020           | Cost-effectiveness (or cost-benefit, cost-utility)                     |                           |          | ?            |                                         |                  |                    |                                       | [63]      |
|                    | Yu, 2018             | Cost-of-illness                                                        |                           | ?        |              |                                         |                  |                    |                                       | [36]      |
|                    | Zhang, 2017          | Cost-of-illness                                                        |                           | ?        |              |                                         |                  |                    |                                       | [34]      |
|                    | Zhou, 2014           | Cost-effectiveness (or cost-benefit, cost-utility)                     |                           | ?        |              |                                         |                  |                    |                                       | [59]      |
| Colombia (UMIC)    | Lara, 2018           | Cost-effectiveness (or cost-benefit, cost-utility)                     |                           | ?        |              |                                         |                  |                    |                                       | [65]      |
|                    | Salcedo-Mejia, 2019  | Cost-of-illness                                                        |                           | ?        |              |                                         |                  |                    |                                       | [41]      |
| El Salvador (LMIC) | Jara, 2019           | Cost-of-illness                                                        |                           | ?        |              |                                         |                  |                    |                                       | [43]      |
| India (LMIC)       | Koul, 2019           | Cost-of-illness                                                        |                           |          |              | ?                                       |                  |                    |                                       | [48]      |
| Kazakhstan (UMIC)  | Kovacs, 2014         | Cost-of-illness                                                        |                           |          | ?            |                                         |                  |                    |                                       | [42]      |
| Kenya (LMIC)       | Dawa, 2020           | Cost-effectiveness (or cost-benefit, cost-utility)                     |                           | ?        |              |                                         |                  |                    |                                       | [78]      |
|                    | Emukule, 2019        | Cost-of-illness                                                        | ?                         | ?        |              |                                         |                  |                    |                                       | [49]      |
| Lao PDR (LMIC)     | Ortega-Sanchez, 2021 | Cost-effectiveness (or cost-benefit, cost-utility)                     |                           |          | ?            |                                         | ?                | ?                  |                                       | [79]      |
| Malawi (LIC)       | Pecenka, 2017        | Cost-of-program                                                        |                           |          |              |                                         | ?                |                    |                                       | [57]      |
| Mali (LIC)         | Orenstein, 2017      | Cost-of-illness AND Cost-effectiveness (or cost-benefit, cost-utility) |                           |          |              |                                         | ?                |                    |                                       | [53]      |
| Mexico (UMIC)      | Betancourt-          | Cost-effectiveness (or                                                 | ?                         |          |              |                                         |                  |                    |                                       | [67]      |

medRxiv preprint doi: <https://doi.org/10.1101/2023.05.08.23289683>; this version posted May 8, 2023. The copyright holder for this preprint (which was not certified by peer review) is the author/funder, who has granted medRxiv a license to display the preprint in perpetuity. This article is a US Government work. It is not subject to copyright under 17 USC 105 and is also made available for use under a CC0 license.

| Country                    | Author, year         | Study type                                         | SAGE target group(s)      |          |              |                                         |                  |                    |                                       | Reference |
|----------------------------|----------------------|----------------------------------------------------|---------------------------|----------|--------------|-----------------------------------------|------------------|--------------------|---------------------------------------|-----------|
|                            |                      |                                                    | None (general population) | Children | Older adults | Persons with chronic medical conditions | Pregnant persons | Healthcare workers | Persons in congregate living settings |           |
|                            | Craviato, 2021       | cost-benefit, cost-utility)                        |                           |          |              |                                         |                  |                    |                                       |           |
|                            | Falcon-Lezama, 2020  | Cost-effectiveness (or cost-benefit, cost-utility) |                           | ?        |              |                                         |                  |                    |                                       | [66]      |
|                            | Tapia-Conyer, 2021   | Cost-effectiveness (or cost-benefit, cost-utility) | ?                         | ?        |              | ?                                       |                  |                    |                                       | [68]      |
| <b>Panama (UMIC)</b>       | Jara, 2019           | Cost-of-illness                                    |                           | ?        |              |                                         |                  |                    |                                       | [43]      |
| <b>Romania (UMIC)</b>      | Kovacs, 2014         | Cost-of-illness                                    |                           |          | ?            |                                         |                  |                    |                                       | [42]      |
| <b>South Africa (UMIC)</b> | Biggerstaff, 2019    | Cost-effectiveness (or cost-benefit, cost-utility) |                           |          |              |                                         | ?                |                    |                                       | [70]      |
|                            | Edoka, 2021          | Cost-effectiveness (or cost-benefit, cost-utility) |                           | ?        | ?            | ?                                       | ?                |                    |                                       | [71]      |
|                            | Tempia, 2019         | Cost-of-illness                                    | ?                         |          |              |                                         |                  |                    |                                       | [44]      |
|                            | Tempia, 2020         | Cost-of-illness                                    |                           | ?        | ?            | ?                                       | ?                |                    |                                       | [45]      |
|                            | de Boer, 2018        | Cost-effectiveness (or cost-benefit, cost-utility) | ?                         |          |              |                                         |                  |                    |                                       | [69]      |
| <b>Thailand (UMIC)</b>     | Choosakulchart, 2013 | Cost-effectiveness (or cost-benefit, cost-utility) |                           |          |              | ?                                       |                  |                    |                                       | [72]      |
|                            | Kittikraisak, 2017   | Cost-effectiveness (or cost-benefit, cost-utility) |                           | ?        |              |                                         |                  |                    |                                       | [74]      |
|                            | Kittikraisak, 2018   | Cost-of-illness                                    |                           | ?        |              |                                         |                  |                    |                                       | [46]      |
|                            | Meeyai, 2015         | Cost-effectiveness (or cost-benefit, cost-utility) |                           | ?        | ?            |                                         |                  |                    |                                       | [73]      |
|                            | Riewpaiboon, 2021    | Cost-of-program                                    |                           |          |              |                                         | ?                |                    |                                       | [56]      |
|                            | Sribhutorn, 2018     | Cost-effectiveness (or cost-benefit, cost-utility) |                           |          |              | ?                                       |                  |                    |                                       | [75]      |

| Country               | Author, year        | Study type                                         | SAGE target group(s)      |          |              |                                         |                  |                    |                                       | Reference |
|-----------------------|---------------------|----------------------------------------------------|---------------------------|----------|--------------|-----------------------------------------|------------------|--------------------|---------------------------------------|-----------|
|                       |                     |                                                    | None (general population) | Children | Older adults | Persons with chronic medical conditions | Pregnant persons | Healthcare workers | Persons in congregate living settings |           |
|                       | Suphanchaimat, 2020 | Cost-effectiveness (or cost-benefit, cost-utility) |                           |          |              |                                         |                  |                    | ?                                     | [76]      |
| <b>Turkiye (UMIC)</b> | Akin, 2016          | Cost-effectiveness (or cost-benefit, cost-utility) |                           |          |              | ?                                       |                  |                    |                                       | [77]      |
| <b>Ukraine (LMIC)</b> | Kovacs, 2014        | Cost-of-illness                                    |                           |          | ?            |                                         |                  |                    |                                       | [42]      |
|                       | Kyi-Kokarieva, 2021 | Cost-effectiveness (or cost-benefit, cost-utility) |                           |          |              |                                         |                  | ?                  |                                       | [80]      |
| <b>Vietnam (LMIC)</b> | Vo, 2017            | Cost-of-illness                                    | ?                         | ?        | ?            |                                         |                  |                    |                                       | [50]      |
|                       | Vo, 2017            | Cost-of-illness                                    | ?                         | ?        | ?            |                                         |                  |                    |                                       | [51]      |
|                       | de Boer, 2018       | Cost-effectiveness (or cost-benefit, cost-utility) | ?                         |          |              |                                         |                  |                    |                                       | [69]      |

Abbreviations: LIC, low-income country; LMIC, lower-middle income country; SAGE, Strategic Advisory Committee of Experts on Immunization; UMIC, upper-middle income country; US\$, US Dollars

<sup>1</sup>China was classified as both UMIC and LMIC corresponding to studies before and after an upward change in World Bank classification in 2010.

Figure S1: Distribution of modified Consolidated Health Economic Evaluation Reporting Standard (CHEERS) quality assessment scores<sup>1</sup>

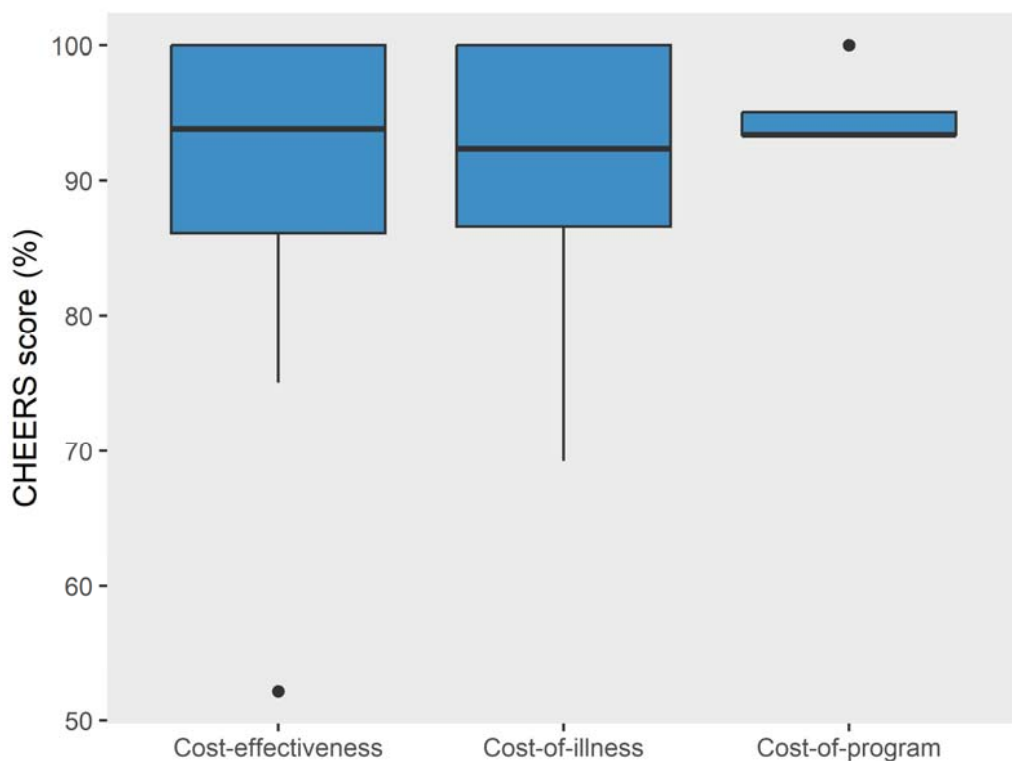

<sup>1</sup>The full CHEERS criteria assessment [28] was performed for cost-effectiveness studies; a modified set of relevant criteria were assessed for cost-of-illness and cost-of-program studies.

**Figure S2: Contribution of direct<sup>1</sup> and indirect<sup>2</sup> costs to costs of influenza outpatient visits and hospitalizations, by Strategic Advisory Committee of Experts on Immunization (SAGE) target group, in low- and middle-income countries**

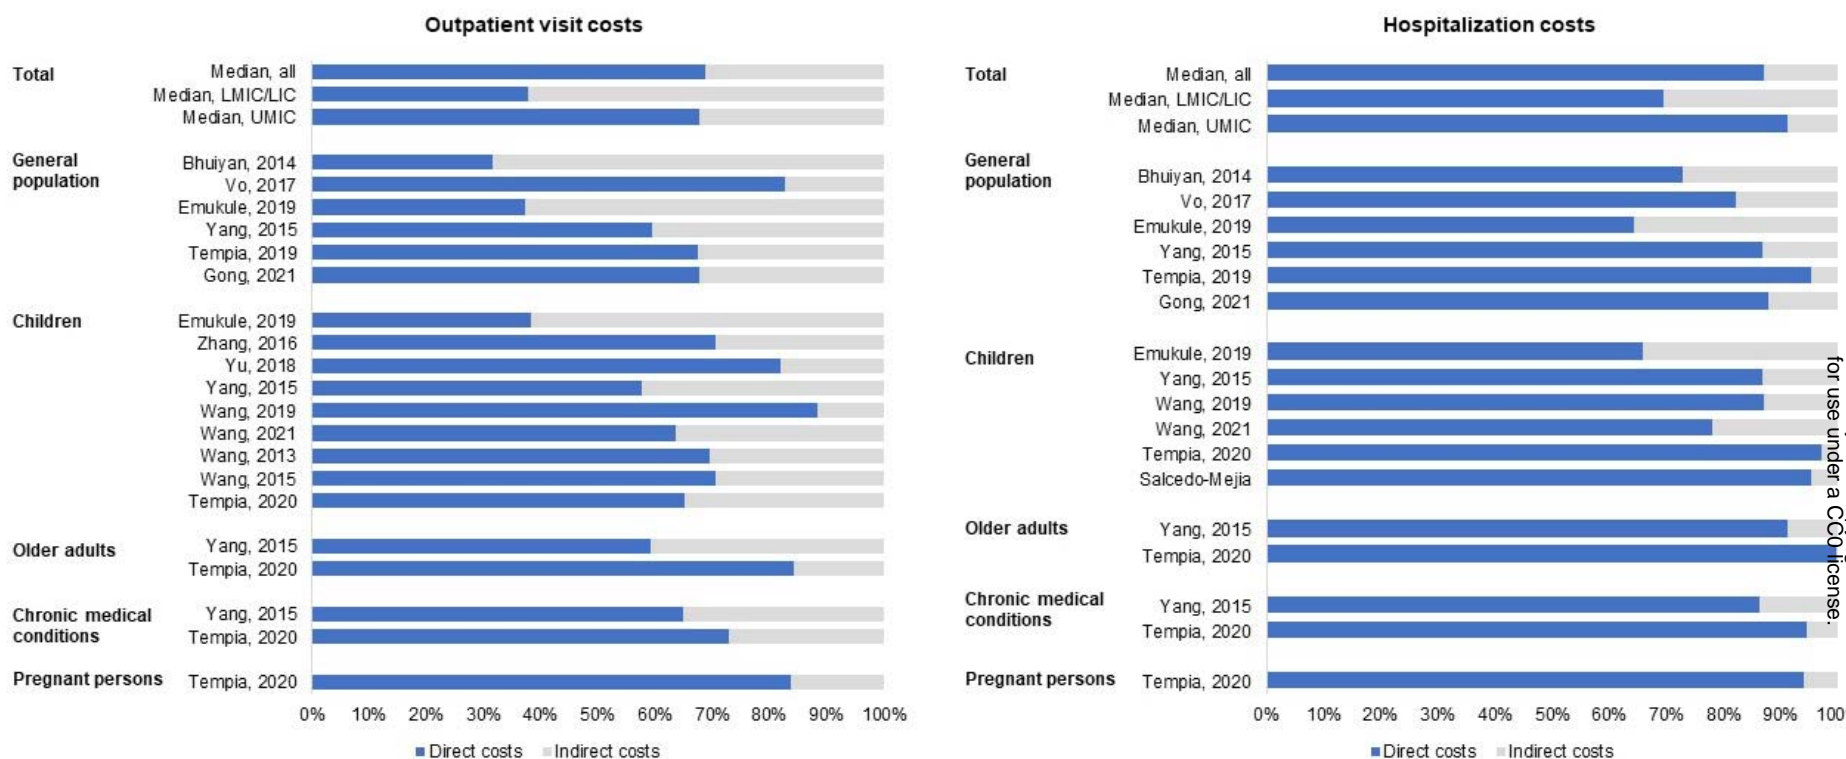

Abbreviations: LIC, low-income country; LMIC, lower-middle income country; UMIC, upper-middle income country

<sup>1</sup>Direct costs were all medical and non-medical costs directly attributable to patient care, as reported in the study.

<sup>2</sup>Indirect costs were all costs not directly attributable to patient care (e.g., lost earnings or lost productivity).

**Table S4: Costs of influenza illness<sup>1</sup>, by Strategic Advisory Committee of Experts on Immunization (SAGE) target group<sup>2</sup> and disease severity (outpatient vs. hospitalized), in low- and middle-income countries**

| Income group                 | Study characteristics   |              |                      |                                                   |                                      |                       |                    | Outpatient visits                                             |                                                                 |                                                 | Hospitalizations                                              |                                                                 |                                                 |                                         |
|------------------------------|-------------------------|--------------|----------------------|---------------------------------------------------|--------------------------------------|-----------------------|--------------------|---------------------------------------------------------------|-----------------------------------------------------------------|-------------------------------------------------|---------------------------------------------------------------|-----------------------------------------------------------------|-------------------------------------------------|-----------------------------------------|
|                              | Study                   | Country      | Target group details | Data source; public or private facilities         | Illness case definition <sup>3</sup> | Study period          | Perspective        | Direct <sup>4</sup> cost per episode (2022 US\$) <sup>5</sup> | Indirect <sup>6</sup> cost per episode (2022 US\$) <sup>5</sup> | Total cost per episode (2022 US\$) <sup>5</sup> | Direct <sup>4</sup> cost per episode (2022 US\$) <sup>5</sup> | Indirect <sup>6</sup> cost per episode (2022 US\$) <sup>5</sup> | Total cost per episode (2022 US\$) <sup>5</sup> | Median length of hospitalization (days) |
| <b>General population</b>    |                         |              |                      |                                                   |                                      |                       |                    |                                                               |                                                                 |                                                 |                                                               |                                                                 |                                                 |                                         |
| JMIC                         | Gong, 2021 [40]         | China        | All ages             | NR                                                | ILI/SARI                             | 2006–19               | Societal           | \$107.13                                                      | \$50.75                                                         | \$149.98                                        | \$1392.72                                                     | \$193.97                                                        | \$1617.14                                       | --                                      |
| JMIC                         | Yang, 2015 [33]         | China        | All ages             | 554 facilities; NR                                | LCI                                  | 2013–14               | Societal           | \$77.35 <sup>7</sup>                                          | \$52.79                                                         | \$155.92                                        | \$1193.36 <sup>7</sup>                                        | \$181.70                                                        | \$1416.80                                       | 9                                       |
| JMIC                         | Tempia, 2019 [44]       | South Africa | All ages             | 7 hospitals and 2 clinics; public                 | ILI/SARI                             | 2013–15               | Societal           | \$32.20                                                       | \$15.50                                                         | \$47.71                                         | \$874.24                                                      | \$42.94                                                         | \$918.37                                        | 5.3                                     |
| JMIC <sup>8</sup>            | Guo, 2012 [47]          | China        | All ages             | 28 hospitals and clinics; public                  | ILI                                  | 2008–09               | Payer <sup>9</sup> | \$29.80                                                       | --                                                              | --                                              | --                                                            | --                                                              | --                                              | --                                      |
| JMIC <sup>10</sup>           | Emukule, 2019 [49]      | Kenya        | All ages             | 4 hospitals and 1 clinic; public and private      | LCI                                  | 2013–14               | Societal           | \$9.26                                                        | \$15.49                                                         | \$23.91                                         | \$90.99                                                       | \$50.67                                                         | \$142.17                                        | 4                                       |
| JMIC                         | Vo, 2017 [50]           | Vietnam      | All ages             | 1 hospital; NR                                    | SARI                                 | 2013–15               | Healthcare system  | --                                                            | --                                                              | --                                              | \$134.27 <sup>12</sup>                                        | --                                                              | --                                              | 7                                       |
| JMIC                         | Vo, 2017 [51]           | Vietnam      | All ages             | 15 pharmacies, 3 clinics, and 1 hospital; private | ILI/SARI                             | 2016                  | Societal           | \$104.46                                                      | \$21.63                                                         | \$128.35                                        | \$99.31                                                       | \$21.63                                                         | \$110.55                                        | --                                      |
| JMIC <sup>11</sup>           | Bhuiyan, 2014 [52]      | Bangladesh   | All ages             | 4 hospitals; public and private                   | LCI                                  | 2010                  | Societal           | \$5.47                                                        | \$11.83                                                         | \$6.24                                          | \$77.67                                                       | \$28.92                                                         | \$106.85                                        | 3                                       |
| <b>Children<sup>13</sup></b> |                         |              |                      |                                                   |                                      |                       |                    |                                                               |                                                                 |                                                 |                                                               |                                                                 |                                                 |                                         |
| JMIC                         | Zhang, 2017 [34]        | China        | <5 years             | 9 hospitals; NR                                   | P&I                                  | 2005–09 <sup>14</sup> | Payer <sup>9</sup> | --                                                            | --                                                              | --                                              | \$480.97 <sup>12</sup>                                        | --                                                              | --                                              | 7.1                                     |
| JMIC                         | Wang, 2013 [31]         | China        | <5 years             | 1 hospital; NR                                    | LCI                                  | 2011–12               | Societal           | \$110.28                                                      | \$48.39                                                         | \$159.04                                        | --                                                            | --                                                              | --                                              | --                                      |
| JMIC                         | Wang, 2015 [32]         | China        | 6 months–11.5 years  | 1 hospital; NR                                    | LCI                                  | 2011–12               | Societal           | \$139.91                                                      | \$58.22                                                         | \$198.13                                        | --                                                            | --                                                              | --                                              | --                                      |
| JMIC                         | Kittikraisak, 2018 [46] | Thailand     | <5 years             | 1 hospital; public                                | LCI                                  | 2011–15               | Societal           | --                                                            | --                                                              | \$26.24                                         | --                                                            | --                                                              | \$293.40                                        | 10                                      |
| JMIC                         | Yu, 2018 [36]           | China        | <5 years             | 1 hospital; NR                                    | LCI                                  | 2011–17               | Patient            | \$107.86                                                      | \$23.94                                                         | \$131.80                                        | --                                                            | --                                                              | --                                              | --                                      |

medRxiv preprint doi: <https://doi.org/10.1101/2023.05.08.23289683>; this version posted May 8, 2023. The copyright holder for this preprint (which was not certified by peer review) is the author/funder, who has granted medRxiv a license to display the preprint in perpetuity. It is not subject to copyright under 17 USC 105 and is also made available for use under a CC0 license.



|                                                |                          |              |             |                                              |          |         |                    |                        |         |          |                         |          |           |     |  |
|------------------------------------------------|--------------------------|--------------|-------------|----------------------------------------------|----------|---------|--------------------|------------------------|---------|----------|-------------------------|----------|-----------|-----|--|
| JMIC                                           | Wang, 2021 [39]          | China        | <5 years    | 1 hospital; NR                               | LCI      | 2011–17 | Societal           | \$118.98               | \$67.85 | \$186.83 | \$1288.85               | \$365.42 | \$1654.23 | 7   |  |
| JMIC                                           | Jara, 2019 [43]          | Panama       | <10 years   | 2 hospitals; public                          | LCI      | 2012–13 | Societal           | --                     | --      | --       | --                      | --       | \$554.32  | --  |  |
| JMIC                                           | Yang, 2015 [33]          | China        | <5 years    | 554 facilities; NR                           | LCI      | 2013–14 | Societal           | \$95.76 <sup>7</sup>   | \$69.98 | \$192.75 | \$1257.20 <sup>7</sup>  | \$192.75 | \$1474.51 | --  |  |
| JMIC                                           | Tempia, 2020 [45]        | South Africa | 6–59 months | 7 hospitals and 2 clinics; public            | ILI/SARI | 2013–15 | Societal           | \$33.40                | \$17.89 | \$50.09  | \$743.04                | \$21.47  | \$764.51  | --  |  |
| JMIC                                           | Salcedo-Mejia, 2019 [41] | Colombia     | <18 years   | 1 hospital; NR                               | LCI      | 2014    | Societal           | --                     | --      | --       | \$1987.30               | \$99.03  | \$2202.74 | 8.9 |  |
| JMIC                                           | Wang 2019 [37]           | China        | 3–17 years  | NR                                           | ILI/SARI | 2016–18 | Societal           | \$35.10                | \$4.55  | \$41.75  | \$471.46                | \$69.97  | \$524.62  | --  |  |
| JMIC                                           | Lai, 2021 [38]           | China        | 6–59 months | 148 community health centers; public         | ILI/SARI | 2019    | Societal           | \$102.18               | --      | --       | \$82.99                 | --       | --        | --  |  |
| JMIC                                           | Jara, 2019 [43]          | El Salvador  | <10 years   | 3 hospitals; public                          | LCI      | 2012–13 | Societal           | --                     | --      | --       | --                      | --       | \$176.30  | --  |  |
| JMIC <sup>10</sup>                             | Emukule, 2019 [49]       | Kenya        | <5 years    | 4 hospitals and 1 clinic; public and private | LCI      | 2013–14 | Societal           | \$10.40                | \$16.73 | \$25.92  | \$90.98                 | \$46.97  | \$137.81  | 4   |  |
| JMIC                                           | Vo, 2017 [50]            | Vietnam      | ≤14 years   | 1 hospital; NR                               | SARI     | 2013–15 | Healthcare system  | --                     | --      | --       | \$96.15 <sup>12</sup>   | --       | --        | --  |  |
| <b>Older adults</b>                            |                          |              |             |                                              |          |         |                    |                        |         |          |                         |          |           |     |  |
| JMIC                                           | Kovacs, 2014 [42]        | Kazakhstan   | ≥65 years   | 19 hospitals; NR                             | ILI/SARI | 2011–12 | Payer <sup>9</sup> | \$19.49 (medical only) | --      | --       | \$302.24 <sup>12</sup>  | --       | --        | --  |  |
| JMIC                                           | Kovacs, 2014 [42]        | Romania      | ≥65 years   | 26 hospitals; NR                             | ILI/SARI | 2011–12 | Payer <sup>9</sup> | \$26.93 (medical only) | --      | --       | \$1048.11 <sup>12</sup> | --       | --        | --  |  |
| JMIC                                           | Kovacs, 2014 [42]        | Ukraine      | ≥65 years   | 10 hospitals; NR                             | ILI/SARI | 2011–12 | Payer <sup>9</sup> | \$26.22 (medical only) | --      | --       | \$110.73 <sup>12</sup>  | --       | --        | --  |  |
| JMIC                                           | Yang, 2015 [33]          | China        | ≥60 years   | 554 facilities; NR                           | LCI      | 2013–14 | Societal           | \$66.30 <sup>7</sup>   | \$45.43 | \$164.52 | \$2499.66 <sup>7</sup>  | \$236.95 | \$2729.25 | --  |  |
| JMIC                                           | Vo, 2017 [50]            | Vietnam      | >64 years   | 1 hospital; NR                               | SARI     | 2013–15 | Healthcare system  | --                     | --      | --       | \$282.37 <sup>12</sup>  | --       | --        | --  |  |
| JMIC                                           | Tempia, 2020 [45]        | South Africa | ≥65 years   | 7 hospitals and 2 clinics; public            | ILI/SARI | 2013–15 | Societal           | \$32.20                | \$5.96  | \$38.17  | \$1056.72               | \$2.39   | \$1059.10 | --  |  |
| JMIC                                           | Lai, 2021 [38]           | China        | ≥60 years   | 148 community health centers; public         | ILI/SARI | 2019    | Societal           | \$60.93                | --      | --       | \$167.08                | --       | --        | --  |  |
| <b>Persons with chronic medical conditions</b> |                          |              |             |                                              |          |         |                    |                        |         |          |                         |          |           |     |  |

|                         |                      |              |                                       |                                         |                           |         |          |                      |         |                            |                        |          |                              |    |
|-------------------------|----------------------|--------------|---------------------------------------|-----------------------------------------|---------------------------|---------|----------|----------------------|---------|----------------------------|------------------------|----------|------------------------------|----|
| JMIC                    | Tempia, 2020 [45]    | South Africa | 5–64 years with HIV, TB, or other UMC | 7 hospitals and 2 clinics; public       | ILI/SARI                  | 2013–15 | Societal | \$32.20              | \$11.93 | \$44.13                    | \$1084.15              | \$63.21  | \$1147.36                    | -- |
| JMIC                    | Yang, 2015 [33]      | China        | All ages with UMC                     | 554 facilities; NR                      | LCI                       | 2013–14 | Societal | \$99.45 <sup>7</sup> | \$54.02 | \$176.79                   | \$1357.87 <sup>7</sup> | \$213.63 | \$1578.86                    | -- |
| JMIC                    | Lai, 2021 [38]       | China        | 18–59 years with UMC                  | 148 community health centers; public    | ILI/SARI                  | 2019    | Societal | \$37.92              | --      | --                         | \$62.52                | --       | --                           | -- |
| JMIC                    | Koul, 2019 [48]      | India        | ≥18 years with diabetes               | 1 hospital; public                      | LCI                       | 2015–17 | Societal | --                   | --      | --                         | --                     | --       | \$847.60                     | 9  |
| <b>Pregnant persons</b> |                      |              |                                       |                                         |                           |         |          |                      |         |                            |                        |          |                              |    |
| JMIC                    | Tempia, 2020 [45]    | South Africa | NA                                    | 7 hospitals and 2 clinics; public       | ILI/SARI                  | 2013–15 | Societal | \$31.01              | \$5.96  | \$36.97                    | \$1024.52              | \$63.21  | \$1088.92                    | -- |
| JMIC                    | Orenstein, 2017 [53] | Mali         | NA                                    | 6 community and referral health centers | LCI and ILI <sup>15</sup> | 2011–14 | Societal |                      |         | \$5.45 (LCI) <sup>15</sup> |                        |          | \$189.98 (ILI) <sup>15</sup> |    |

Abbreviations: HIV, human immunodeficiency virus; ILI, influenza-like illness; LCI, laboratory-confirmed influenza; LIC, low-income country; LMIC, lower-middle income country; NA, not applicable; NR, not reported; P&I, pneumonia and influenza hospitalization; SARI, severe acute respiratory infection; TB, tuberculosis; UMC, underlying medical condition; UMIC, upper-middle income country; US\$, US Dollars

<sup>1</sup>Median costs were preferentially abstracted from source publications; if unavailable, mean costs were abstracted.

<sup>2</sup>No cost-of-illness papers were identified for healthcare workers or individuals in congregate living settings in low- and middle-income countries.

<sup>3</sup>For source publications presenting results for both LCI and syndromic illness, the results for LCI were used.

<sup>4</sup>Direct costs were all medical and non-medical costs directly attributable to patient care.

<sup>5</sup>Calculated or converted value; not presented in source publication.

<sup>6</sup>Indirect costs were all costs not directly attributable to patient care (e.g., lost earnings or lost productivity).

<sup>7</sup>Direct medical and non-medical costs were summarized separately in the source publication; medians were summed to obtain a total median direct cost.

<sup>8</sup>China changed classification from LMIC to UMIC in 2010 [24], after the study period, and was thus classified as LMIC for this study.

<sup>9</sup>No indirect costs were included in the total estimate because of study perspective. The specific payer was not specified in the source publication.

<sup>10</sup>Kenya changed classification from LIC to LMIC in 2014 [24], during the study period, and was thus classified as LMIC.

<sup>11</sup>Bangladesh changed classification from LIC to LMIC in 2014 [24], after the study period, and was thus classified as LIC.

<sup>12</sup>Included only direct medical costs (no non-medical costs).

<sup>13</sup>Although SAGE recommendations specifically reference children aged <5 years [1], publications with data for children aged <18 years were included.

<sup>14</sup>The full publication study period was 2005–2011; however, 2009–2010 and 2010–2011 were excluded because of H1N1 pandemic activity. Abstracted values represent the median of 2005–2009 annual values.

<sup>15</sup>Cost data were only available for one hospitalized LCI case; thus, ILI hospitalization costs were abstracted.

**Table S5: Cost-effectiveness of influenza vaccination<sup>1</sup>, by Strategic Advisory Committee of Experts on Immunization (SAGE) target group, in low- and middle-income countries**

| Study characteristics       |                                                                         |              |                      |                                         |                |                   | Study results                                   |                                              |                              |
|-----------------------------|-------------------------------------------------------------------------|--------------|----------------------|-----------------------------------------|----------------|-------------------|-------------------------------------------------|----------------------------------------------|------------------------------|
| Income group                | Study                                                                   | Country      | Target group details | Intervention <sup>2</sup>               | Comparator     | Perspective       | ICER or net benefit (in 2022 US\$) <sup>3</sup> | Interpretation <sup>4</sup>                  | Cost-effectiveness threshold |
| <b>General population</b>   |                                                                         |              |                      |                                         |                |                   |                                                 |                                              |                              |
| UMIC                        | de Boer, 2018 [69]                                                      | South Africa | All ages             | Vaccination with TIV at 15% coverage    | No vaccination | Societal          | \$1297.71– 2213.60 per QALY                     | None <sup>5</sup>                            | None <sup>5</sup>            |
| UMIC                        | Betancourt-Craviato, 2021 [67] and Tapia-Conyer, 2021 [68] <sup>6</sup> | Mexico       | 5–59 years           | Vaccination with TIV at 50% coverage    | No vaccination | Societal          | NA                                              | Cost-saving                                  | NR                           |
| LMIC                        | de Boer, 2018 [69]                                                      | Vietnam      | All ages             | Vaccination with TIV at 15% coverage    | No vaccination | Societal          | \$757.51–1306.31 per QALY                       | None <sup>5</sup>                            | None <sup>5</sup>            |
| <b>Children<sup>7</sup></b> |                                                                         |              |                      |                                         |                |                   |                                                 |                                              |                              |
| UMIC                        | Giglio, 2012 [58]                                                       | Argentina    | 6–23 months          | Vaccination at 50% coverage; product NR | No vaccination | Healthcare system | \$2298.74 per QALY                              | Cost-effective                               | 1–3 times GDP per capita     |
| UMIC                        | Giglio, 2012 [58]                                                       | Argentina    | 6–36 months          | Vaccination at 50% coverage; product NR | No vaccination | Healthcare system | \$1441.45 per QALY                              | Cost-effective                               | 1–3 times GDP per capita     |
| UMIC                        | Giglio, 2012 [58]                                                       | Argentina    | 6 months–5 years     | Vaccination at 50% coverage; product NR | No vaccination | Healthcare system | \$937.01 per QALY                               | Cost-effective                               | 1–3 times GDP per capita     |
| UMIC                        | Meeyai, 2015 [73]                                                       | Thailand     | 2–11 years           | Vaccination with TIV at 66% coverage    | No vaccination | Societal          | \$5557.72 per DALY                              | Cost-effective                               | GDP per capita               |
| UMIC                        | Meeyai, 2015 [73]                                                       | Thailand     | 2–11 years           | Vaccination with LAIV at 66% coverage   | No vaccination | Societal          | \$5662.74 per DALY                              | Cost-effective                               | GDP per capita               |
| UMIC                        | Meeyai, 2015 [73]                                                       | Thailand     | 2–17 years           | Vaccination with LAIV at 66% coverage   | No vaccination | Societal          | \$7186.90 per DALY                              | Cost-effective                               | GDP per capita               |
| UMIC                        | Meeyai, 2015 [73]                                                       | Thailand     | 2–5 years            | Vaccination with LAIV at 66% coverage   | No vaccination | Societal          | \$3702.23 per DALY                              | Cost-effective                               | GDP per capita               |
| UMIC                        | Meeyai, 2015 [73]                                                       | Thailand     | 6–11 years           | Vaccination with LAIV at 66% coverage   | No vaccination | Societal          | \$2955.78 per DALY                              | Cost-effective                               | GDP per capita               |
| UMIC                        | Meeyai, 2015 [73]                                                       | Thailand     | 12–17 years          | Vaccination with LAIV at 66% coverage   | No vaccination | Societal          | \$2301.86 per DALY                              | Cost-effective                               | GDP per capita               |
| UMIC                        | Zhou, 2014 [59] <sup>8</sup>                                            | China        | 6–59 months          | Vaccination at 12% coverage; product NR | No vaccination | Healthcare system | \$0 per medically attended case                 | Cost-effective to cost-saving across seasons | GDP per capita               |
| UMIC                        | Zhou, 2014 [59] <sup>8</sup>                                            | China        | 5–14 years           | Vaccination at 11% coverage; product NR | No vaccination | Healthcare system | \$48.10 per medically attended                  | Cost-effective                               | GDP per capita               |

|      |                                                                   |              |             |                                                                     |                |                   | case                         |                                                     |                                         |
|------|-------------------------------------------------------------------|--------------|-------------|---------------------------------------------------------------------|----------------|-------------------|------------------------------|-----------------------------------------------------|-----------------------------------------|
| UMIC | Kittikraisak, 2017 [74]                                           | Thailand     | 6–60 months | Vaccination with TIV at 29–31% coverage                             | No vaccination | Societal          | \$668.25– 29,492.86 per QALY | Not cost-effective to cost-effective across seasons | 1–3 times GDP per capita                |
| UMIC | Lara, 2018 [65]                                                   | Colombia     | <5 years    | Vaccination with TIV; coverage NR                                   | No vaccination | Healthcare system | NA                           | Cost-saving                                         | 1–3 times GDP per capita                |
| UMIC | Lara, 2018 [65]                                                   | Colombia     | <5 years    | Vaccination with TIV; coverage NR                                   | No vaccination | Societal          | NA                           | Cost-saving                                         | 1–3 times GDP per capita                |
| UMIC | Falcon-Lezama, 2020 [66] and Tapia-Conyer, 2021 [68] <sup>6</sup> | Mexico       | 5–11 years  | Vaccination with TIV at 50% coverage                                | No vaccination | Societal          | NA                           | Cost-saving                                         | NR                                      |
| UMIC | Edoka, 2021 [71]                                                  | South Africa | 6–59 months | Vaccination with TIV at 2% coverage                                 | No vaccination | Healthcare system | \$8507.71 per QALY           | Not cost-effective                                  | Country-specific threshold <sup>9</sup> |
| UMIC | Edoka, 2021 [71]                                                  | South Africa | 6–59 months | Vaccination with TIV at 2% coverage                                 | No vaccination | Societal          | \$5982.66 per QALY           | Not cost-effective                                  | Country-specific threshold <sup>9</sup> |
| LMIC | Dawa, 2020 [78]                                                   | Kenya        | 6–23 months | Vaccination with TIV (SH) at 30% coverage                           | No vaccination | Societal          | \$850.77–1573.19 per DALY    | Not cost-effective                                  | 1–51% of GDP per capita                 |
| LMIC | Dawa, 2020 [78]                                                   | Kenya        | 2–5 years   | Vaccination with TIV (SH) at 35% coverage                           | No vaccination | Societal          | \$1073.40–1786.73 per DALY   | Not cost-effective                                  | 1–51% of GDP per capita                 |
| LMIC | Dawa, 2020 [78]                                                   | Kenya        | 6–14 years  | Vaccination with TIV (SH) at 40% coverage                           | No vaccination | Societal          | \$1048.41–3539.39 per DALY   | Not cost-effective                                  | 1–51% of GDP per capita                 |
| LMIC | Dawa, 2020 [78]                                                   | Kenya        | 6–23 months | Vaccination with TIV (NH) at 30% coverage                           | No vaccination | Societal          | \$502.06–2132.04 per DALY    | Not cost-effective                                  | 1–51% of GDP per capita                 |
| LMIC | Dawa, 2020 [78]                                                   | Kenya        | 2–5 years   | Vaccination with TIV (NH) at 35% coverage                           | No vaccination | Societal          | \$639.50–2122.95 per DALY    | Not cost-effective                                  | 1–51% of GDP per capita                 |
| LMIC | Dawa, 2020 [78]                                                   | Kenya        | 6–14 years  | Vaccination with TIV (NH) at 40% coverage                           | No vaccination | Societal          | \$1141.56–2525.05 per DALY   | Not cost-effective                                  | 1–51% of GDP per capita                 |
| LMIC | Dawa, 2020 [78]                                                   | Kenya        | 6–23 months | Vaccination with TIV (SH and NH; biannual campaign) at 45% coverage | No vaccination | Societal          | \$770.12–4663.91 per DALY    | Not cost-effective                                  | 1–51% of GDP per capita                 |
| LMIC | Dawa, 2020 [78]                                                   | Kenya        | 2–5 years   | Vaccination with TIV (SH and NH; biannual campaign) at 50% coverage | No vaccination | Societal          | \$751.95–4640.05 per DALY    | Not cost-effective                                  | 1–51% of GDP per capita                 |
| LMIC | Dawa, 2020 [78]                                                   | Kenya        | 6–14 years  | Vaccination with TIV (SH and NH; biannual campaign) at 55% coverage | No vaccination | Societal          | \$1002.98–5369.29 per DALY   | Not cost-effective                                  | 1–51% of GDP per capita                 |
| LMIC | Dawa, 2020 [78]                                                   | Kenya        | 6–23 months | Vaccination with TIV (SH and NH; year-round) at 60% coverage        | No vaccination | Societal          | \$1302.85–9010.91 per DALY   | Not cost-effective                                  | 1–51% of GDP per capita                 |

|                                                |                           |              |                                                      |                                                                        |                                                      |                   |                              |                    |                                         |
|------------------------------------------------|---------------------------|--------------|------------------------------------------------------|------------------------------------------------------------------------|------------------------------------------------------|-------------------|------------------------------|--------------------|-----------------------------------------|
| LMIC                                           | Dawa, 2020 [78]           | Kenya        | 2–5 years                                            | Vaccination with TIV (SH and NH; year-round) at 65% coverage           | No vaccination                                       | Societal          | \$1327.84–8970.02 per DALY   | Not cost-effective | 1–51% of GDP per capita                 |
| LMIC                                           | Dawa, 2020 [78]           | Kenya        | 6–14 years                                           | Vaccination with TIV (SH and NH; year-round) at 70% coverage           | No vaccination                                       | Societal          | \$1666.33–7738.73 per DALY   | Not cost-effective | 1–51% of GDP per capita                 |
| <b>Older adults</b>                            |                           |              |                                                      |                                                                        |                                                      |                   |                              |                    |                                         |
| UMIC                                           | Meeyai, 2015 [73]         | Thailand     | ≥60 years                                            | Vaccination with TIV at 66% coverage                                   | Current vaccination program (10% coverage)           | Societal          | \$3612.20 per DALY           | Cost-effective     | GDP per capita                          |
| UMIC                                           | Chen, 2019 [60]           | China        | ≥60 years                                            | Vaccination with TIV; coverage NR                                      | No vaccination                                       | Societal          | \$10313.18 per QALY          | Cost-effective     | 3 times GDP per capita                  |
| UMIC                                           | Chen, 2019 [60]           | China        | ≥60 years                                            | Vaccination with QIV; coverage NR                                      | No vaccination                                       | Societal          | \$28040.63 per QALY          | Cost-effective     | 3 times GDP per capita                  |
| UMIC                                           | Jiang, 2020 [62]          | China        | 69 years <sup>10</sup>                               | Vaccination with TIV at 27% coverage                                   | No vaccination                                       | Societal          | NA                           | Cost-saving        | 3 times GDP per capita                  |
| UMIC                                           | Jiang, 2020 [62]          | China        | 69 years <sup>10</sup>                               | Vaccination with QIV at 27% coverage                                   | No vaccination                                       | Societal          | NA                           | Cost-saving        | 3 times GDP per capita                  |
| UMIC                                           | Yang, 2020 [63]           | China        | ≥60 years                                            | Vaccination with TIV at 30% coverage (fully funded government program) | Current vaccination program (self-paid; 0% coverage) | Societal          | \$5605.57 per QALY           | Cost-effective     | GDP per capita                          |
| UMIC                                           | Yan, 2021 [64]            | China        | ≥60 years                                            | Vaccination with QIV at 48% coverage                                   | No vaccination                                       | Societal          | \$12133.20 per QALY          | Not cost-effective | GDP per capita                          |
| UMIC                                           | Edoka, 2021 [71]          | South Africa | ≥65 years                                            | Vaccination with TIV at 3% coverage                                    | No vaccination                                       | Healthcare system | \$2373.98 per QALY           | Cost-effective     | Country-specific threshold <sup>9</sup> |
| UMIC                                           | Edoka, 2021 [71]          | South Africa | ≥65 years                                            | Vaccination with TIV at 3% coverage                                    | No vaccination                                       | Societal          | \$2310.37 per QALY           | Cost-effective     | Country-specific threshold <sup>9</sup> |
| LMIC                                           | Ortega-Sanchez, 2021 [79] | Lao PDR      | ≥60 years                                            | Vaccination with TIV at 100% coverage                                  | No vaccination                                       | Societal          | \$903.24 per life-year saved | Cost-effective     | 1–3 times GDP per capita                |
| <b>Persons with chronic medical conditions</b> |                           |              |                                                      |                                                                        |                                                      |                   |                              |                    |                                         |
| UMIC                                           | Sribhutorn, 2018 [75]     | Thailand     | ≤40 years with acute coronary syndrome <sup>11</sup> | Vaccination with TIV at 100% coverage                                  | No vaccination                                       | Societal          | NA                           | Cost-saving        | 1–3 times GDP per capita                |
| UMIC                                           | Yang, 2019 [61]           | China        | Persons with diabetes                                | Vaccination with TIV at 40% coverage                                   | No vaccination                                       | Societal          | \$1798.51 per QALY           | Cost-effective     | GDP per capita                          |
| UMIC                                           | Tapia-Conyer, 2021 [68]   | Mexico       | 12–49 years with UMC <sup>12</sup>                   | Vaccination with TIV at 75% coverage                                   | Current vaccination program (9–35% coverage)         | Societal          | NA                           | Cost-saving        | NR                                      |

|                                                          |                           |              |                                                     |                                                                                                       |                               |                      |                               |                                          |                                          |
|----------------------------------------------------------|---------------------------|--------------|-----------------------------------------------------|-------------------------------------------------------------------------------------------------------|-------------------------------|----------------------|-------------------------------|------------------------------------------|------------------------------------------|
| UMIC                                                     | Akin, 2016 [77]           | Turkiye      | >18 years with diabetes                             | Vaccination with 20% coverage; product NR                                                             | Current program (9% coverage) | Govt. (public payer) | \$637.83 per QALY             | Cost-effective                           | 1–3 times GDP per capita                 |
| UMIC                                                     | Akin, 2016 [77]           | Turkiye      | >18 years with diabetes                             | Vaccination with 20% coverage; product NR                                                             | Current program (9% coverage) | Societal             | \$35.25 per QALY              | Cost-effective                           | 1–3 times GDP per capita                 |
| UMIC                                                     | Choosakulchart, 2013 [72] | Thailand     | ≥60 years with coronary heart disease <sup>13</sup> | Vaccination with product and coverage NR                                                              | No vaccination                | Societal             | \$1386.98 per QALY            | Cost-effective                           | Country-specific threshold <sup>14</sup> |
| UMIC                                                     | Edoka, 2021 [71]          | South Africa | Persons living with HIV/AIDS                        | Vaccination with TIV at 5.51% coverage                                                                | No vaccination                | Healthcare system    | \$1986.65 per QALY            | Cost-effective                           | Country-specific threshold <sup>9</sup>  |
| UMIC                                                     | Edoka, 2021 [71]          | South Africa | Persons living with HIV/AIDS                        | Vaccination with TIV at 5.51% coverage                                                                | No vaccination                | Societal             | NA                            | Cost-saving                              | Country-specific threshold <sup>9</sup>  |
| UMIC                                                     | Edoka, 2021 [71]          | South Africa | Persons with other UMC                              | Vaccination with TIV at 3.14% coverage                                                                | No vaccination                | Healthcare system    | \$2973.72 per QALY            | Cost-effective                           | Country-specific threshold <sup>9</sup>  |
| UMIC                                                     | Edoka, 2021 [71]          | South Africa | Persons with other UMC                              | Vaccination with TIV at 3.14% coverage                                                                | No vaccination                | Societal             | NA                            | Cost-saving                              | Country-specific threshold <sup>9</sup>  |
| <b>Pregnant persons (including infants &lt;6 months)</b> |                           |              |                                                     |                                                                                                       |                               |                      |                               |                                          |                                          |
| UMIC                                                     | Biggerstaff, 2019 [70]    | South Africa | NA                                                  | Vaccination prioritizing persons with HIV (70% coverage in HIV+ and 44% coverage in HIV-); product NR | No vaccination                | Societal             | \$5550.81 per QALY            | Potentially cost-effective <sup>15</sup> | GDP per capita                           |
| UMIC                                                     | Biggerstaff, 2019 [70]    | South Africa | NA                                                  | Vaccination with 50% coverage; product NR                                                             | No vaccination                | Societal             | \$7012.79 per QALY            | Potentially cost-effective <sup>15</sup> | GDP per capita                           |
| UMIC                                                     | Edoka, 2021 [71]          | South Africa | NA                                                  | Vaccination with TIV at 48.9% coverage                                                                | No vaccination                | Healthcare system    | \$2283.11 per QALY            | Cost-effective                           | Country-specific threshold <sup>9</sup>  |
| UMIC                                                     | Edoka, 2021 [71]          | South Africa | NA                                                  | Vaccination with TIV at 48.9% coverage                                                                | No vaccination                | Societal             | NA                            | Cost-saving                              | Country-specific threshold <sup>9</sup>  |
| LMIC                                                     | Ortega-Sanchez, 2021 [79] | Lao PDR      | NA                                                  | Vaccination with TIV at 100% coverage                                                                 | No vaccination                | Societal             | \$5797.15 per life-year saved | Cost-effective                           | 1–3 times GDP per capita                 |
| LIC                                                      | Orenstein, 2017 [53]      | Mali         | NA                                                  | Vaccination with TIV; coverage NR <sup>16</sup>                                                       | No vaccination                | Societal             | \$1033.76 per DALY            | Cost-effective <sup>17</sup>             | GDP per capita                           |
| <b>Healthcare workers</b>                                |                           |              |                                                     |                                                                                                       |                               |                      |                               |                                          |                                          |
| LMIC                                                     | Ortega-Sanchez, 2021 [79] | Lao PDR      | NA                                                  | Vaccination with TIV at 100% coverage                                                                 | No vaccination                | Societal             | NA                            | Cost-saving                              | 1–3 times GDP per capita                 |
| LMIC                                                     | Kyi-Kokarieva, 2021 [80]  | Ukraine      | NA                                                  | Vaccination at 70% coverage; product NR                                                               | No vaccination                | Societal             | NA                            | Cost-saving                              | NR                                       |
| <b>Persons in congregate living settings</b>             |                           |              |                                                     |                                                                                                       |                               |                      |                               |                                          |                                          |
| UMIC                                                     | Suphanchaimat, 2020 [76]  | Thailand     | Incarcerated persons                                | Vaccination with TIV at 10% coverage <sup>18</sup>                                                    | No vaccination                | Govt.                | \$2108.55 per DALY            | Cost-effective                           | NR                                       |

Abbreviations: DALY, disability-adjusted life years; ICER, incremental cost-effectiveness ratio; Govt, government; HIV, human immunodeficiency virus; LAIV, live attenuated influenza vaccine; LIC, low-income country; LMIC, lower-middle income country; NA, not applicable; NR, not reported; QALY, quality-adjusted life years; QIV, quadrivalent influenza vaccine; TIV, trivalent influenza vaccine; UMIC, upper-middle income country; US\$, US Dollars; WTP, willingness-to-pay.

<sup>1</sup>Cost-effectiveness, cost-utility, and cost-benefit analyses were eligible for inclusion if they included a comparison of influenza vaccination vs. either no vaccination or modifications to current vaccination program. Studies that only compared the cost-effectiveness of different influenza vaccine products were not included.

<sup>2</sup>Data for each base-scenario intervention or each perspective assessed are presented in individual rows. Sensitivity analyses are not presented. Vaccine coverage was rounded to the nearest integer.

<sup>3</sup>Calculated or converted value; not presented in source publication. Ranges represent annual seasonal estimates or varying illness attack rate.

<sup>4</sup>Interpretation per source publication. Interpretations of highly cost-effective and cost-effective were both combined as “cost-effective.”

<sup>6</sup>Similar data sources and analysis methods used in both publications; these were counted collectively as one study for Figure 3.

<sup>5</sup>The study authors intentionally did not specify a cost-effectiveness threshold or interpretation because a country-specific threshold was not available.

<sup>7</sup>Although SAGE recommendations specifically reference children aged <5 years [1], publications with data for children aged <18 years were included.

<sup>8</sup>This study also modeled alternative strategies to increase vaccination rates; results are not shown.

<sup>9</sup>This study used a cost-effectiveness threshold for South Africa that reflects the health opportunity cost of health spending.

<sup>10</sup>The age of the hypothetical cohort was based on the mean age of the target population in China (69 years).

<sup>11</sup>Age groups of ≥50 years and ≥60 years were also modeled; only results for ≥40 years are shown as this was inclusive of all other groups. All scenarios were cost-effective.

<sup>12</sup>Medical conditions included diabetes, high blood pressure, morbid obesity, chronic renal failure, asthma, and pregnancy.

<sup>13</sup>Included patients with angina and cardiac arrest/myocardial infarction.



- <sup>14</sup>A country-specific threshold of 100,000 Thai Baht was used (rationale not reported).
- <sup>15</sup>The 90% uncertainty intervals for the ICER overlapped the cost-effectiveness threshold.
- <sup>16</sup>Additional scenarios adjusted for poor access to care and increased severity of disease; all scenarios were cost-effective.
- <sup>17</sup>Results were cost-effective when the cost per pregnant woman vaccinated was \$1.00 or less.
- <sup>18</sup>Additional scenarios modeled higher coverage of 30% and 100%; all scenarios were cost-effective.

## References

1. World Health Organization, *Vaccines against influenza: WHO position paper—May 2022*. Wkly Epidemiol Rec, 2022. **19**: p. 185-208.
2. Morales, K.F., et al., *Seasonal influenza vaccination policies in the 194 WHO Member States: The evolution of global influenza pandemic preparedness and the challenge of sustaining equitable vaccine access*. Vaccine X, 2021. **8**: p. 100097.
3. Iuliano, A.D., et al., *Estimates of global seasonal influenza-associated respiratory mortality: a modelling study*. Lancet, 2018. **391**(10127): p. 1285-1300.
4. Lafond, K.E., et al., *Global burden of influenza-associated lower respiratory tract infections and hospitalizations among adults: A systematic review and meta-analysis*. PLoS Med, 2021. **18**(3): p. e1003550.
5. Lafond, K.E., et al., *Global Role and Burden of Influenza in Pediatric Respiratory Hospitalizations, 1982-2012: A Systematic Analysis*. PLoS Med, 2016. **13**(3): p. e1001977.
6. Kraigsley, A.M., et al., *Barriers and activities to implementing or expanding influenza vaccination programs in low- and middle-income countries: A global survey*. Vaccine, 2021. **39**(25): p. 3419-3427.
7. Jit, M., A.T. Newall, and P. Beutels, *Key issues for estimating the impact and cost-effectiveness of seasonal influenza vaccination strategies*. Hum Vaccin Immunother, 2013. **9**(4): p. 834-40.
8. World Health Organization, *WHO Manual for estimating the economic burden of seasonal influenza*. 2016, World Health Organization.
9. Chaiyakunapruk, N., et al., *Rationale and opportunities in estimating the economic burden of seasonal influenza across countries using a standardized WHO tool and manual*. Influenza Other Respir Viruses, 2018. **12**(1): p. 13-21.
10. World Health Organization, *Guidance on the economic evaluation of influenza vaccination*. 2016, World Health Organization.
11. Newall, A.T., et al., *WHO guide on the economic evaluation of influenza vaccination*. Influenza Other Respir Viruses, 2018. **12**(2): p. 211-219.
12. World Health Organization, *Flutool plus: WHO seasonal influenza immunization costing tool (SIICT), Pilot version 1.0*. 2020.
13. Ott, J.J., et al., *Influenza vaccines in low and middle income countries: a systematic review of economic evaluations*. Hum Vaccin Immunother, 2013. **9**(7): p. 1500-11.
14. de Francisco Shapovalova, N., et al., *A systematic review of the social and economic burden of influenza in low- and middle-income countries*. Vaccine, 2015. **33**(48): p. 6537-44.
15. Peasah, S.K., et al., *Influenza cost and cost-effectiveness studies globally—a review*. Vaccine, 2013. **31**(46): p. 5339-48.
16. D'Angiolella, L.S., et al., *Costs and effectiveness of influenza vaccination: a systematic review*. Ann Ist Super Sanita, 2018. **54**(1): p. 49-57.
17. Valcárcel Nazco, C., et al., *[Cost-effectiveness of vaccines for the prevention of seasonal influenza in different age groups: a systematic review]*. Rev Esp Salud Publica, 2018. **92**.
18. Ting, E.E.K., B. Sander, and W.J. Ungar, *Systematic review of the cost-effectiveness of influenza immunization programs*. Vaccine, 2017. **35**(15): p. 1828-1843.
19. de Courville, C., et al., *The economic burden of influenza among adults aged 18 to 64: A systematic literature review*. Influenza Other Respir Viruses, 2022. **16**(3): p. 376-385.
20. Imai, C., et al., *A systematic review and meta-analysis of the direct epidemiological and economic effects of seasonal influenza vaccination on healthcare workers*. PLoS One, 2018. **13**(6): p. e0198685.

21. Dilokthornsakul, P., et al., *Economic evaluation of seasonal influenza vaccination in elderly and health workers: A systematic review and meta-analysis*. *EClinicalMedicine*, 2022. **47**: p. 101410.
22. Loong, D., et al., *Systematic Review on the Cost-Effectiveness of Seasonal Influenza Vaccines in Older Adults*. *Value Health*, 2022. **25**(8): p. 1439-1458.
23. Warmath, C.R., et al., *Comparisons in the Health and Economic Assessments of Using Quadrivalent Versus Trivalent Influenza Vaccines: A Systematic Literature Review*. *Value Health*, 2022.
24. The World Bank Group. *World Bank Open Data*. 2023 [cited 2022 November 1]; Available from: <https://data.worldbank.org/>.
25. World Health Organization, *Evolution of a pandemic: A (H1N1) 2009, April 2009–August 2010*. 2013.
26. Veritas Health Innovation, *Covidence systematic review software*. Available at [www.covidence.org](http://www.covidence.org). Melbourne, Australia.
27. World Health Organization. *Global Health Expenditure Database*. 2023 [cited 2022 November 1]; Available from: <https://apps.who.int/nha/database/Home/Index/en>.
28. Husereau, D., et al., *Consolidated Health Economic Evaluation Reporting Standards (CHEERS)-- explanation and elaboration: a report of the ISPOR Health Economic Evaluation Publication Guidelines Good Reporting Practices Task Force*. *Value Health*, 2013. **16**(2): p. 231-50.
29. Dunn, A., S.D. Grosse, and S.H. Zuvekas, *Adjusting Health Expenditures for Inflation: A Review of Measures for Health Services Research in the United States*. *Health Serv Res*, 2018. **53**(1): p. 175-196.
30. Bureau of Economic Analysis. *GDP Price Deflator*. 2023 [cited 2022 November 1]; Available from: <https://www.bea.gov/data/prices-inflation/gdp-price-deflator>.
31. Wang, D., et al., *Socio-economic burden of influenza among children younger than 5 years in the outpatient setting in Suzhou, China*. *PLoS ONE* [Electronic Resource], 2013. **8**(8): p. e69035.
32. Wang, X., et al., *[Socio-economic impact of influenza in children: a single-centered hospital study in Shanghai]*. *Chung-Hua Liu Hsing Ping Hsueh Tsa Chih Chinese Journal of Epidemiology*, 2015. **36**(1): p. 27-30.
33. Yang, J., et al., *The economic burden of influenza-associated outpatient visits and hospitalizations in China: a retrospective survey*. *Infectious Diseases of Poverty*, 2015. **4**: p. 44.
34. Zhang, X., et al., *Pneumonia and influenza hospitalizations among children under 5 years of age in Suzhou, China, 2005-2011*. *Influenza Other Respir Viruses*, 2017. **11**(1): p. 15-22.
35. Yang, J., et al., *The impact of influenza on the health related quality of life in China: an EQ-5D survey*. *BMC Infectious Diseases*, 2017. **17**(1): p. 686.
36. Yu, J., et al., *[Clinical characteristics and economic burden of influenza among children under 5 years old, in Suzhou, 2011-2017]*. *Zhonghua Liu Xing Bing Xue Za Zhi*, 2018. **39**(6): p. 847-851.
37. Wang, S.Y., et al., *[Disease burden of influenza in schools and child care settings in rural areas of Hangzhou, 2016-2018]*. *Chung-Hua Yu Fang i Hsueh Tsa Chih [Chinese Journal of Preventive Medicine]*, 2019. **53**(7): p. 713-718.
38. Lai, X., et al., *The Economic Burden of Influenza-Like Illness among Children, Chronic Disease Patients, and the Elderly in China: A National Cross-Sectional Survey*. *International Journal of Environmental Research & Public Health* [Electronic Resource], 2021. **18**(12): p. 10.
39. Wang, Y., et al., *Economic burden of influenza illness among children under 5 years in Suzhou, China: Report from the cost surveys during 2011/12 to 2016/17 influenza seasons*. *Vaccine*, 2021. **39**(8): p. 1303-1309.
40. Gong, H., et al., *Estimating the disease burden of seasonal influenza in China, 2006-2019. [Chinese]*. *National Medical Journal of China*, 2021. **101**(8): p. 560-567.

41. Salcedo-Mejia, F., et al., *Economic Cost of Severe Acute Respiratory Infection Associated to Influenza in Colombian Children: A Single Setting Analysis*. Value in Health Regional Issues, 2019. **20**: p. 159-163.
42. Kovacs, G., et al., *Medical and economic burden of influenza in the elderly population in central and eastern European countries*. Human vaccines & Immunotherapeutics, 2014. **10**(2): p. 428-440.
43. Jara, J.H., et al., *Costs associated with acute respiratory illness and select virus infections in hospitalized children, El Salvador and Panama, 2012-2013*. J Infect, 2019. **79**(2): p. 108-114.
44. Tempia, S., et al., *Health and economic burden of influenza-associated illness in South Africa, 2013-2015*. Influenza & Other Respiratory Viruses, 2019. **13**(5): p. 484-495.
45. Tempia, S., et al., *Influenza economic burden among potential target risk groups for immunization in South Africa, 2013-2015*. Vaccine, 2020. **38**(45): p. 7007-7014.
46. Kittikraisak, W., et al., *Comparison of incidence and cost of influenza between healthy and high-risk children <60 months old in Thailand, 2011-2015*. PLoS ONE [Electronic Resource], 2018. **13**(5): p. e0197207.
47. Guo, R.N., et al., *Epidemiologic and economic burden of influenza in the outpatient setting: a prospective study in a subtropical area of China*. PLoS ONE [Electronic Resource], 2012. **7**(7): p. e41403.
48. Koul, P.A., et al., *Epidemiology and costs of severe acute respiratory infection and influenza hospitalizations in adults with diabetes in India*. Journal of Infection in Developing Countries, 2019. **13**(3): p. 204-211.
49. Emukule, G.O., et al., *The cost of influenza-associated hospitalizations and outpatient visits in Kenya*. BMC Public Health, 2019. **19**(Suppl 3): p. 471.
50. Vo, T.Q., et al., *Economic burden of influenza at a tertiary hospital in Vietnam*. Asian Pacific Journal of Tropical Disease, 2017. **7**(3): p. 144-150.
51. Vo, T.Q., et al., *Social and economic burden of patients with influenza-like illness and clinically diagnosed flu treated at various health facilities in Vietnam*. Clinicoeconomics & Outcomes Research, 2017. **9**: p. 423-432.
52. Bhuiyan, M.U., et al., *Economic burden of influenza-associated hospitalizations and outpatient visits in Bangladesh during 2010*. Influenza & Other Respiratory Viruses, 2014. **8**(4): p. 406-413.
53. Orenstein, E.W., et al., *Cost-effectiveness of maternal influenza immunization in Bamako, Mali: A decision analysis*. PLoS ONE [Electronic Resource], 2017. **12**(2): p. e0171499.
54. Pallas, S.W., et al., *Program cost analysis of influenza vaccination of health care workers in Albania*. Vaccine, 2020. **38**(2): p. 220-227.
55. Yang, J., et al., *Seasonal influenza vaccination in China: Landscape of diverse regional reimbursement policy, and budget impact analysis*. Vaccine, 2016. **34**(47): p. 5724-5735.
56. Riewpaiboon, A., *Cost analysis of influenza vaccination for pregnant women in Thailand*. Pharmaceutical Sciences Asia, 2021. **48**(2): p. 99-106.
57. Pecenka, C., et al., *Maternal influenza immunization in Malawi: Piloting a maternal influenza immunization program costing tool by examining a prospective program*. PLoS ONE [Electronic Resource], 2017. **12**(12): p. e0190006.
58. Giglio, N., et al., *Public health and economic benefits of new pediatric influenza vaccination programs in Argentina*. Human vaccines & Immunotherapeutics, 2012. **8**(3): p. 312-322.
59. Zhou, L., et al., *Cost-effectiveness of alternative strategies for annual influenza vaccination among children aged 6 months to 14 years in four provinces in China*. PLoS ONE [Electronic Resource], 2014. **9**(1): p. e87590.

60. Chen, C., et al., [*Cost-effective analysis of seasonal influenza vaccine in elderly Chinese population*]. *Chung-Hua Yu Fang i Hsueh Tsa Chih [Chinese Journal of Preventive Medicine]*, 2019. **53**(10): p. 993-999.
61. Yang, J., et al., [*Cost-effectiveness of potential government fully-funded influenza vaccination in population with diabetes in China*]. *Zhonghua Yu Fang Yi Xue Za Zhi*, 2019. **53**(10): p. 1000-1006.
62. Jiang, M., et al., *Cost-effectiveness of quadrivalent versus trivalent influenza vaccine for elderly population in China*. *Vaccine*, 2020. **38**(5): p. 1057-1064.
63. Yang, J., et al., *Cost-effectiveness of introducing national seasonal influenza vaccination for adults aged 60 years and above in mainland China: a modelling analysis*. *BMC Medicine*, 2020. **18**(1): p. 90.
64. Yan, H., et al., *Cost-effectiveness analysis of quadrivalent influenza vaccination for older adults aged 60 and above in mainland China. [Chinese]*. *National Medical Journal of China*, 2021. **101**(30): p. 2405-2412.
65. Lara, C., D. De Graeve, and F. Franco, *Cost-Effectiveness Analysis of Pneumococcal and Influenza Vaccines Administered to Children Less Than 5 Years of Age in a Low-Income District of Bogota, Colombia*. *Value in Health Regional Issues*, 2018. **17**: p. 21-31.
66. Falcon-Lezama, J.A., et al., *Influenza in the school-aged population in Mexico: burden of disease and cost-effectiveness of vaccination in children*. *BMC Infectious Diseases*, 2020. **20**(1): p. 240.
67. Betancourt-Cravioto, M., et al., *Public Health and Economic Benefits of Influenza Vaccination of the Population Aged 50 to 59 Years without Risk Factors for Influenza Complications in Mexico: A Cross-Sectional Epidemiological Study*. 2021. **9**(3): p. 24.
68. Tapia-Conyer, R., et al., *A Call for a Reform of the Influenza Immunization Program in Mexico: Epidemiologic and Economic Evidence for Decision Making*. 2021. **9**(3): p. 19.
69. de Boer, P.T., et al., *The cost-effectiveness of trivalent and quadrivalent influenza vaccination in communities in South Africa, Vietnam and Australia*. *Vaccine*, 2018. **36**(7): p. 997-1007.
70. Biggerstaff, M., et al., *A cost-effectiveness analysis of antenatal influenza vaccination among HIV-infected and HIV-uninfected pregnant women in South Africa*. *Vaccine*, 2019. **37**(46): p. 6874-6884.
71. Edoka, I., et al., *A cost-effectiveness analysis of South Africa's seasonal influenza vaccination programme*. *Vaccine*, 2021. **39**(2): p. 412-422.
72. Choosakulchart, P., et al., *Cost-utility evaluation of influenza vaccination in patients with existing coronary heart diseases in Thailand*. *Asian Biomedicine*, 2013. **7**(3): p. 425-435.
73. Meeyai, A., et al., *Seasonal influenza vaccination for children in Thailand: a cost-effectiveness analysis*. *PLoS Medicine / Public Library of Science*, 2015. **12**(5): p. e1001829; discussion e1001829.
74. Kittikraisak, W., et al., *Cost-effectiveness of inactivated seasonal influenza vaccination in a cohort of Thai children 60 months of age*. *PLoS ONE*, 2017. **12**(8) (no pagination).
75. Sribhutorn, A., et al., *Influenza vaccination in acute coronary syndromes patients in Thailand: the cost-effectiveness analysis of the prevention for cardiovascular events and pneumonia*. *Journal of Geriatric Cardiology*, 2018. **15**(6): p. 413-421.
76. Suphanchaimat, R., et al., *Cost Effectiveness and Budget Impact Analyses of Influenza Vaccination for Prisoners in Thailand: An Application of System Dynamic Modelling*. *International Journal of Environmental Research & Public Health [Electronic Resource]*, 2020. **17**(4): p. 14.
77. Akin, L., et al., *Cost-Effectiveness of Increasing Influenza Vaccination Coverage in Adults with Type 2 Diabetes in Turkey*. *PLoS ONE [Electronic Resource]*, 2016. **11**(6): p. e0157657.
78. Dawa, J., et al., *Seasonal influenza vaccination in Kenya: an economic evaluation using dynamic transmission modelling*. *BMC Medicine*, 2020. **18**(1): p. 223.

79. Ortega-Sanchez, I.R., et al., *Cost-effectiveness of seasonal influenza vaccination in pregnant women, healthcare workers and adults >= 60 years of age in Lao People's Democratic Republic*. *Vaccine*, 2021. **39**(52): p. 7633-7645.
80. Kyi-Kokarieva, V.G., L.I. Padalko, and L.V. Kriachkova, *Socio-economic substantiation of expediency of seasonal influenza vaccine prophylaxis among medical workers*. *Medicni Perspektivi*, 2021. **26**(4): p. 205-212.
81. Jenkin, D.C., et al., *A rapid evidence appraisal of influenza vaccination in health workers: An important policy in an area of imperfect evidence*. *Vaccine X*, 2019. **2**: p. 100036.
82. Gavi, *Gavi board starts framing Alliance's approach to 2021–2025 period*. 2018, Gavi.
83. Gavi. *Gavi Board meeting, 7-8 December 2022*. 2022 [cited 2023 April 10]; Available from: <https://www.gavi.org/governance/gavi-board/minutes/7-8-december-2022>.
84. Cherian, T., et al., *Factors and considerations for establishing and improving seasonal influenza vaccination of health workers: Report from a WHO meeting, January 16-17, Berlin, Germany*. *Vaccine*, 2019. **37**(43): p. 6255-6261.
85. Thompson, M.G., et al., *Underdetection of laboratory-confirmed influenza-associated hospital admissions among infants: a multicentre, prospective study*. *Lancet Child Adolesc Health*, 2019. **3**(11): p. 781-794.
86. Macias, A.E., et al., *The disease burden of influenza beyond respiratory illness*. *Vaccine*, 2021. **39 Suppl 1**: p. A6-a14.
87. Levin, A., et al., *WHO-led consensus statement on vaccine delivery costing: process, methods, and findings*. *BMC Med*, 2022. **20**(1): p. 88.
88. Levine, O.S., et al., *A policy framework for accelerating adoption of new vaccines*. *Hum Vaccin*, 2010. **6**(12): p. 1021-4.
89. Turner, H.C., et al., *An Introduction to the Main Types of Economic Evaluations Used for Informing Priority Setting and Resource Allocation in Healthcare: Key Features, Uses, and Limitations*. *Front Public Health*, 2021. **9**: p. 722927.
90. Kazibwe, J., et al., *The Use of Cost-Effectiveness Thresholds for Evaluating Health Interventions in Low- and Middle-Income Countries From 2015 to 2020: A Review*. *Value Health*, 2022. **25**(3): p. 385-389.
91. Leech, A.A., et al., *Use and Misuse of Cost-Effectiveness Analysis Thresholds in Low- and Middle-Income Countries: Trends in Cost-per-DALY Studies*. *Value Health*, 2018. **21**(7): p. 759-761.
92. Ochalek, J., J. Lomas, and K. Claxton, *Estimating health opportunity costs in low-income and middle-income countries: a novel approach and evidence from cross-country data*. *BMJ Glob Health*, 2018. **3**(6): p. e000964.
93. Bertram, M.Y., et al., *Cost-effectiveness thresholds: pros and cons*. *Bull World Health Organ*, 2016. **94**(12): p. 925-930.
94. Robinson, L.A., et al., *Understanding and improving the one and three times GDP per capita cost-effectiveness thresholds*. *Health Policy Plan*, 2017. **32**(1): p. 141-145.
95. de Boer, P.T., et al., *A systematic review of the health economic consequences of quadrivalent influenza vaccination*. *Expert Rev Pharmacoecon Outcomes Res*, 2017. **17**(3): p. 249-265.
96. Crespo, C., et al., *Comparative efficiency research (COMER): meta-analysis of cost-effectiveness studies*. *BMC Med Res Methodol*, 2014. **14**: p. 139.
97. Ofori, S.K., et al., *Economic evaluations of interventions against influenza at workplaces: systematic review*. *Occup Med (Lond)*, 2022. **72**(2): p. 70-80.
98. World Health Organization, *Coadministration of seasonal inactivated influenza and COVID-19 vaccines*. 2021.
99. Jit, M., et al., *The broader economic impact of vaccination: reviewing and appraising the strength of evidence*. *BMC Med*, 2015. **13**: p. 209.

100. Jit, M. and R. Hutubessy, *Methodological Challenges to Economic Evaluations of Vaccines: Is a Common Approach Still Possible?* Appl Health Econ Health Policy, 2016. **14**(3): p. 245-52.
